# Supplementary material for: Thermally activated delayed fluorescence emitters showing wide-range near-infrared piezochromism and their use in deep-red OLEDs
Source: Royal Society of Chemistry journal article supplement (doi:10.1039/d3sc05188a), 2023-11-29
Supplement: d3sc05188a1.pdf [file d3sc05188a1.pdf]

# Thermally Activated Delayed Fluorescence Emitters for Wide-Range Near-infrared Piezochromism and Deep-Red OLEDs

*Pagidi Sudhakar, Abhishek Kumar Gupta, David Cordes and Eli Zysman-Colman\**

<sup>a</sup>Organic Semiconductor Centre, EaStCHEM School of Chemistry, University of St Andrews, St Andrews, UK, KY16 9ST. E-mail: [eli.zysman-colman@st-andrews.ac.uk](mailto:eli.zysman-colman@st-andrews.ac.uk)

## Table of contents

| <b>Section</b>                               | <b>Pages</b> |
|----------------------------------------------|--------------|
| General experimental details.....            | S2-S5        |
| Literature reports and reaction scheme.....  | S6-S7        |
| Synthesis and spectral characterization..... | S8-S20       |
| X-ray crystallography and DFT results.....   | S21-S22      |
| Photophysical data.....                      | S23-S26      |
| OLED data.....                               | S26-S27      |
| References.....                              | S28-S30      |

## Experimental Section

*General Synthetic Procedures.* The following starting materials were synthesized according to literature materials: 1,2-bis(4-(di-*p*-tolylamino)phenyl)ethane-1,2-dione (**1**),<sup>1</sup> 1,2-bis(4'-(diphenylamino)-[1,1'-biphenyl]-4-yl)ethane-1,2-dione(**2**),<sup>2</sup> 2,2'-(1,4-dioxo-1,4-dihydronaphthalene-2,3-diyl)bis(isoindoline-1,3-dione) (**3**),<sup>3</sup> 2,3-diaminonaphthalene-1,4-dione (**4**).<sup>3</sup> All other reagents and solvents were obtained from commercial sources and used as received. Air-sensitive reactions were performed under a nitrogen atmosphere using Schlenk techniques, no special precautions were taken to exclude air or moisture during work-up and crystallization. Anhydrous tetrahydrofuran, acetonitrile, and toluene were obtained from an MBraun SPS5 solvent purification system. Flash column chromatography was carried out using silica gel (Silica-P from Silicycle, 60 Å, 40-63 µm). Analytical thin-layer-chromatography (TLC) was performed with silica plates with aluminum backings (250 µm with F-254 indicator). TLC visualization was accomplished by 254/365 nm UV lamp. HPLC analysis was conducted on a Shimadzu LC-40 HPLC system. HPLC traces were performed using an ACE Excel 2 C18 analytical column. HPLC and gel permeation chromatography (GPC) was conducted on a Shimadzu LC-40 HPLC system. GPC trace was performed using a Shim-pack GPC-803 column with THF as mobile phase. <sup>1</sup>H, and <sup>13</sup>C spectra were recorded on a Bruker Advance spectrometer (400 MHz for <sup>1</sup>H, 101 or 125 MHz for <sup>13</sup>C). The following abbreviations have been used for multiplicity assignments: “s” for singlet, “d” for doublet, “t” for triplet, “dd” for doublet of doublets and “m” for multiplet. <sup>1</sup>H and <sup>13</sup>C NMR spectra were referenced residual solvent peaks with respect to TMS (δ = 0 ppm). Melting points were measured using open-ended capillaries on an Electrothermal 1101D Mel-Temp apparatus and are uncorrected. High-resolution mass spectrometry (HRMS) was performed at the University of Edinburgh. Elemental analyses were performed by the School of Geosciences at the University of Edinburgh. PXRD was performed at room temperature using a PANalytical Empyrean diffractometer in Bragg-Brentano geometry using Cu Kα1 radiation with a primary beam monochromator (λ = 1.54060 Å).

*Theoretical Calculations.* All ground-state optimizations have been carried out at the Density Functional Theory (DFT) level with Gaussian16<sup>4</sup> using the PBE0 functional<sup>5</sup> and the 6-31G(d,p) basis set<sup>6</sup>. Excited-state calculations have been performed at Time-Dependent DFT (TD-DFT)

within the Tamm-Dancoff approximation (TDA)<sup>7</sup> using the same functional and basis set as for ground state geometry optimization. Spin-orbit coupling matrix elements ( $\xi$ ) were calculated based on the optimized singlet excited state geometry. Molecular orbitals were visualized using GaussView 6.0<sup>8</sup>. Calculations were automated using an in-house designed software package, *Silico*, which uses a number of 3<sup>rd</sup> party libraries and programs, including extraction and processing of results: cclib<sup>9</sup>, generations of 3D images<sup>10</sup>: VMD & Tachyon<sup>11</sup>.

*Electrochemistry measurements.* Cyclic Voltammetry (CV) analysis was performed on an Electrochemical Analyzer potentiostat model 620E from CH Instruments at a sweep rate of 100 mV/s. Differential pulse voltammetry (DPV) was conducted with an increment potential of 0.004 V and pulse amplitude, width, and period of 50 mV, 0.05, and 0.5 s, respectively. Samples were prepared as DCM solutions, which were degassed by sparging with MeCN-saturated argon gas for 5 minutes prior to measurements. All measurements were performed using 0.1 M DCM solution of tetra-*n*-butylammonium hexafluorophosphate ([<sup>n</sup>Bu<sub>4</sub>N][PF<sub>6</sub>]). An Ag/Ag<sup>+</sup> electrode was used as the reference electrode while a platinum electrode and a platinum wire were used as the working electrode and counter electrode, respectively. The redox potentials are reported relative to a saturated calomel electrode (SCE) with a ferrocenium/ferrocene (Fc/Fc<sup>+</sup>) redox couple as the internal standard (0.46 V vs SCE)<sup>12</sup>.

*Photophysical measurements.* Optically dilute solutions of concentrations on the order of 10<sup>-5</sup> or 10<sup>-6</sup> M were prepared in spectroscopic or HPLC grade solvents for absorption and emission analysis. Absorption spectra were recorded at room temperature on a Shimadzu UV-2600 double beam spectrophotometer with a 1 cm quartz cuvette. Molar absorptivity determination was verified by linear regression analysis of values obtained from at least four independent solutions at varying concentrations with absorbance ranging from 0.48 to 0.17 for **MeTPA-BQ**, 0.15 to 0.37 for **tBuTPA-BQ** and 0.54 to 0.19 for **TPPA-BQ**.

Toluene solutions were degassed via three freeze-pump-thaw cycles. Steady-state emission and time-resolved emission spectra were recorded at 298 K using an Edinburgh Instruments FS5 fluorimeter. Thin films were then spin-coated on a quartz substrate using a spin speed of 1500 rpm for 60 s. Absolute photoluminescence quantum yields ( $\Phi_{\text{PLS}}$ ) were determined using an integrating sphere that is equipped with an FS5 spectrometer. The  $\Phi_{\text{PLS}}$  were measured in air and N<sub>2</sub>

environment by purging the integrating sphere with N<sub>2</sub> gas flow for 2 min. Steady-state PL spectra were measured using a xenon lamp as the source. Time-gated PL spectra (delayed emission/phosphorescence) were measured using a pulsed microsecond flash lamp by the multi-channel scaling (MCS) mode in FS5. The time-gated PL spectra for the samples were collected between 1-9 ms ( $\lambda_{\text{exc}} = 450$  nm). Temperature-dependent (100 to 298 K) measurements were performed using an Oxford Instruments OPTISTAT DN-V cryostat controlled by an Oxford Instruments Mercury iTC temperature controller connected to the FS5 spectrometer. Samples were allowed to equilibrate at each temperature before measurements were conducted.

The singlet-triplet energy splitting ( $\Delta E_{\text{ST}}$ ) in 2-MeTHF was estimated from the onset of steady-state and phosphorescence emission at 77 K ( $\lambda_{\text{exc}} = 450$  nm). Phosphorescence spectra collected by using pulsed microsecond flashlamp (1-9 ms). Prompt fluorescence lifetimes were measured using a picosecond pulsed diode laser (375 nm). Phosphorescence lifetimes were measured using a pulsed xenon microsecond flash lamp. Samples were ground mechanically using a mortar and pestle for 5 min. Steady-state PL ( $\lambda_{\text{exc}} = 450$  nm) and time-resolved measurements, prompt lifetime using TCSPC ( $\lambda_{\text{exc}} = 375$  nm) and delayed lifetime using microsecond flash lamp ( $\lambda_{\text{exc}} = 340$  nm), were conducted for the as-prepared and ground samples.

*Fitting of time-resolved luminescence measurements:* Time-resolved PL measurements were fitted to a sum of exponentials decay model, with chi-squared ( $\chi^2$ ) values between 1 and 2, using the EI FLS980 software. Each component of the decay is assigned a weight, ( $w_i$ ), which is the contribution of the emission from each component to the total emission.

The average lifetime was then calculated using the following:

- Two exponential decay model:

$$\tau_{\text{AVG}} = \tau_1 w_1 + \tau_2 w_2$$

with weights defined as  $w_1 = \frac{A_1 \tau_1}{A_1 \tau_1 + A_2 \tau_2}$  and  $w_2 = \frac{A_2 \tau_2}{A_1 \tau_1 + A_2 \tau_2}$  where A1 and A2 are the preexponential-factors of each component.

- Three exponential decay model:

$$\tau_{\text{AVG}} = \tau_1 w_1 + \tau_2 w_2 + \tau_3 w_3$$

with weights defined as  $w_1 = \frac{A_1\tau_1}{A_1\tau_1 + A_2\tau_2 + A_3\tau_3}$ ,  $w_2 = \frac{A_2\tau_2}{A_1\tau_1 + A_2\tau_2 + A_3\tau_3}$  and  $w_3 = \frac{A_3\tau_3}{A_1\tau_1 + A_2\tau_2 + A_3\tau_3}$

where  $A_1$ ,  $A_2$  and  $A_3$  are the preexponential-factors of each component.

### ***OLED fabrication and characterization***

The OLED devices were fabricated in a bottom-emitting structure via thermal evaporation in a high vacuum at a base pressure of  $< 5 \times 10^{-7}$  mbar. A pre-patterned glass substrate coated with indium-doped tin oxide (ITO) was cleaned sequentially by ultrasonication in acetone and isopropanol for 15 minutes. The temperature of the ultrasonication bath was set at 60-70 °C. The cleaned substrate was exposed to oxygen plasma for 3 min to remove all dust and organics on the ITO surface and to increase the work function of the ITO anode for better hole injection from the anode to the organic layer. The substrate was loaded in the thermal evaporator. The organic layers were deposited at a rate of 0.3-1.0 Å/s, monitored using a quartz crystal. The electron injection layer, LiF, was deposited at a rate of 0.05 Å/s, while the Al cathode was deposited initially with a rate of 0.5 Å/s to obtain 10 nm thickness and after that, the rate of the Al cathode was increased to 3 Å/s. Two custom-made shadow masks were used to define the area of the evaporations. The organic layers and LiF were evaporated with the same shadow mask, but Al was evaporated with the other mask. The active area of the OLED was 2 mm<sup>2</sup>, determined by the spatial overlap of the anode and cathode electrodes. All the devices were encapsulated with glass lids and UV epoxy resin inside a N<sub>2</sub>-filled globe box. The luminance-current-voltage characteristics were measured in an ambient environment using a Keithley 2400 source meter and a homemade photodiode circuit connected to a Keithley 2000 multimeter for the voltage reading. The external quantum efficiency was calculated assuming the Lambertian emission pattern for the OLEDs. The electroluminescence spectra were recorded by an Andor DV420-BV CCD spectrometer.

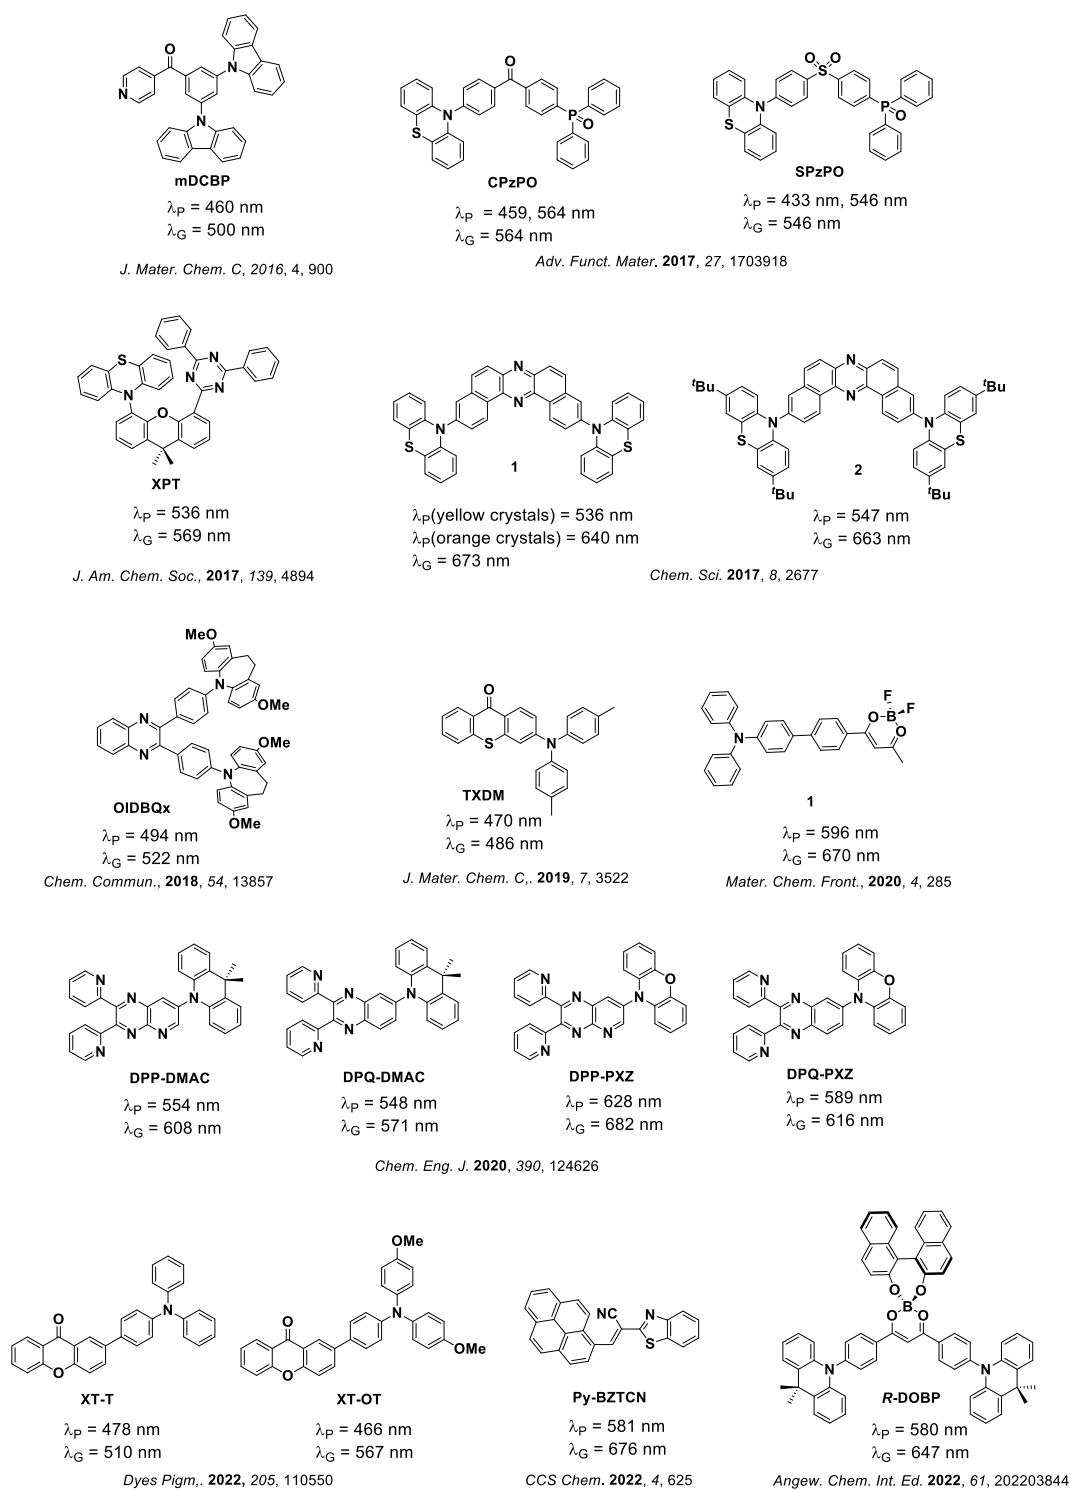

Figure S1. Reported TADF-MCL materials ( $\lambda_P$  and  $\lambda_G$  for pristine and ground emission wavelength, respectively).

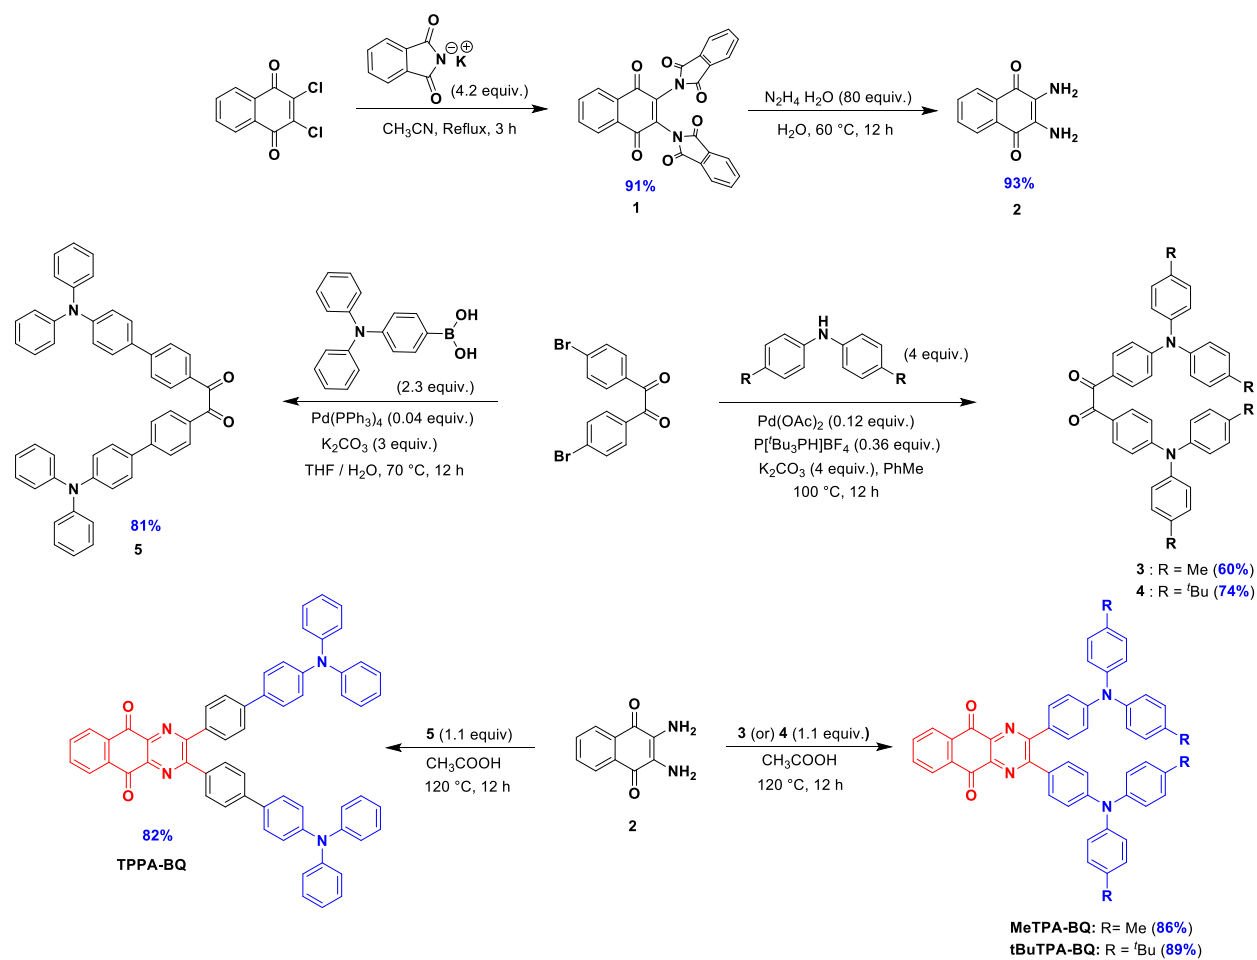

Scheme S1. Synthesis of MeTPA-BQ, tBuTPA-BQ and TPPA-BQ

## 2,3-bis(4-(di-*p*-tolylamino)phenyl)benzo[*g*]quinoxaline-5,10-dione (MeTPA-BQ)

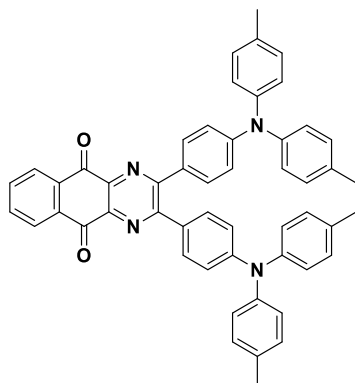

A solution of 2,3-diamino-1,4-naphthoquinone (**2**) (100 mg, 531  $\mu\text{mol}$ , 1 equiv.) and 1,2-bis(4-(di-*p*-tolylamino)phenyl)ethane-1,2-dione (**3**) (351 mg; 584  $\mu\text{mol}$ , 1.1 equiv.) in glacial acetic acid (5 mL) was heated at 100 °C for 3 h. The reaction mixture was allowed to cool to room temperature. The precipitate was filtered, then washed with water. The crude mixture was purified by silica gel flash column chromatography using DCM : hexane = 3:1 as the eluent to afford the desired compound as a white solid. **Yield:** 86%. **R<sub>f</sub>:** 0.28 (DCM : hexane = 1:2 on silica gel). **Mp:** 328-330 °C. **<sup>1</sup>H NMR (400 MHz, CDCl<sub>3</sub>)  $\delta$  (ppm):** 8.40 (dd,  $J = 5.8, 3.3$  Hz, 2H), 7.86 (dd,  $J = 5.8, 3.3$  Hz, 2H), 7.59 (d,  $J = 8.9$  Hz, 4H), 7.26 (s, 1H), 7.11 (d,  $J = 8.1$  Hz, 8H), 7.04 (d,  $J = 8.4$  Hz, 8H), 6.93 (d,  $J = 8.9$  Hz, 4H), 2.35 (s, 12H). **<sup>13</sup>C NMR (125 MHz, CDCl<sub>3</sub>)  $\delta$  (ppm):** 181.57, 156.09, 150.09, 144.32, 141.22, 134.61, 133.83, 133.31, 131.00, 130.10, 129.18, 127.62, 125.69, 77.37, 77.05, 76.73, 20.96. **HR-MS[M+H]<sup>+</sup> Calculated:** (C<sub>52</sub>H<sub>41</sub>N<sub>4</sub>O<sub>2</sub>) 753.3224; **Found:** 753.3184. **Anal.** Calcd. for C<sub>52</sub>H<sub>40</sub>N<sub>4</sub>O<sub>2</sub>: C, 82.95%; H, 5.36%; N, 7.44%. Found: C, 83.34%; H, 5.54%; N, 7.52%. **HPLC-GPC purity:** 100%. Retention time: 13.2 min.



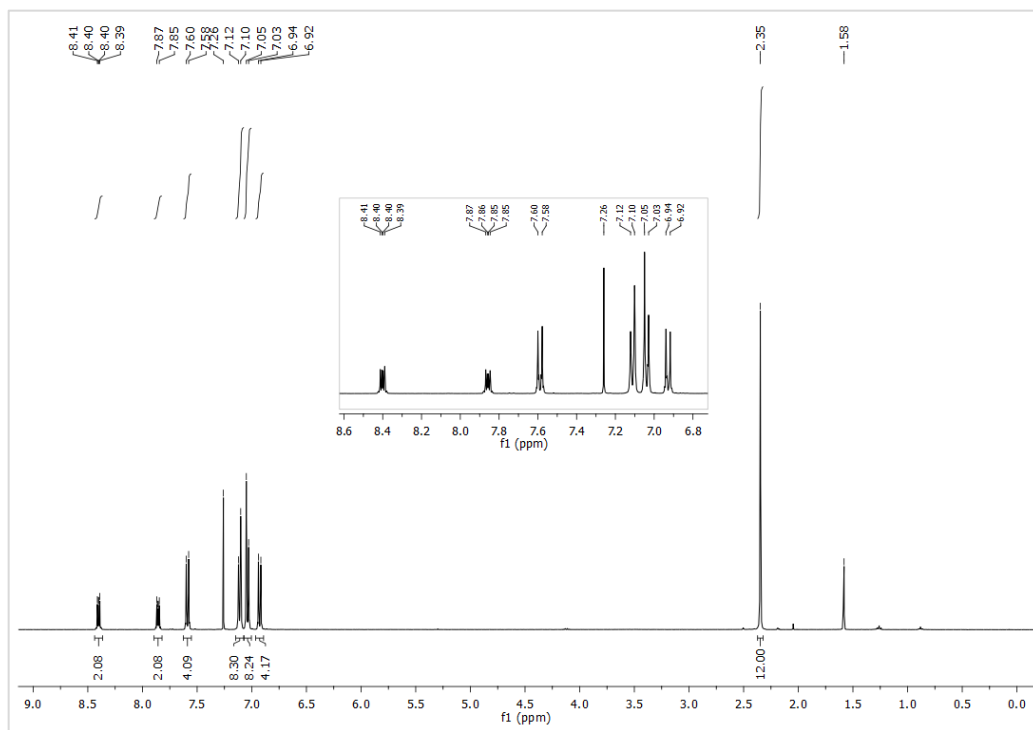

Figure S2.  $^1\text{H}$  NMR of MeTPA-BQ in  $\text{CDCl}_3$

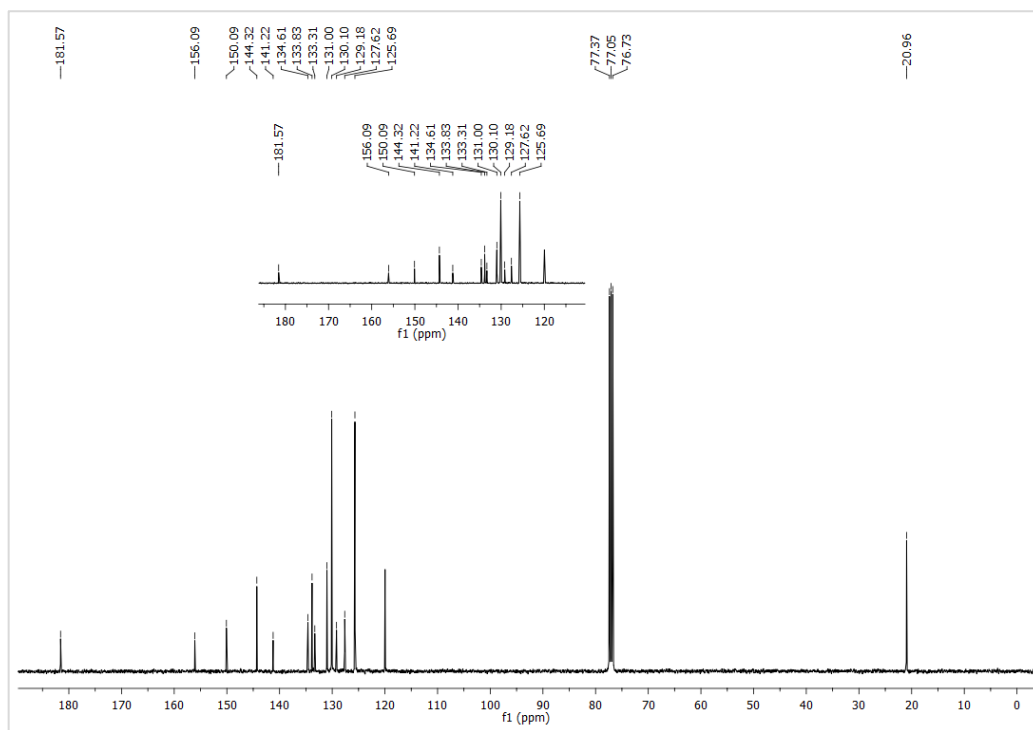

Figure S3.  $^{13}\text{C}$  NMR of MeTPA-BQ in  $\text{CDCl}_3$

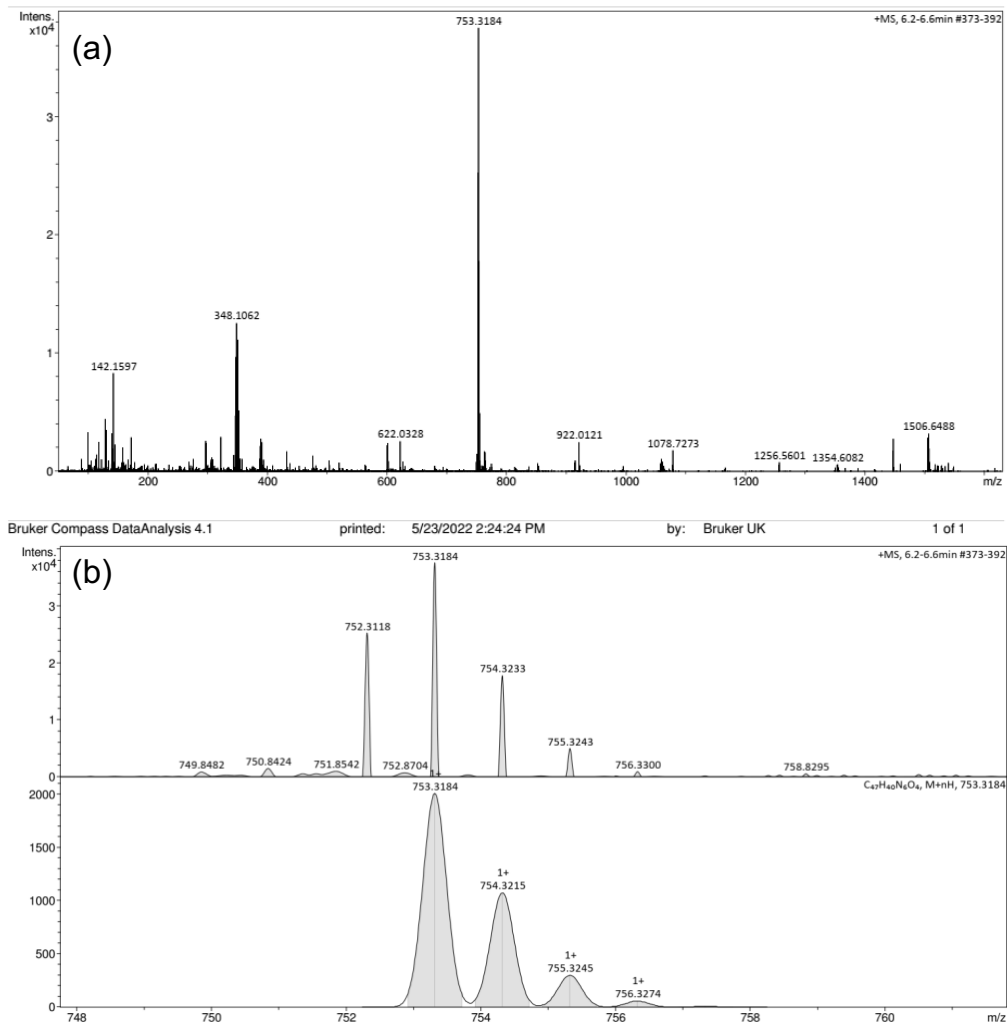

Figure S4. HRMS of (a) MeTPA-BQ and (b) its isotopic distribution pattern

**Analysis Result:**

| Element  | Expected % | Found (1) | Found (2) | Found (3) |
|----------|------------|-----------|-----------|-----------|
| Nitrogen | 7.44       | 7.53      | 7.51      |           |
| Carbon   | 82.95      | 82.95     | 83.73     |           |
| Hydrogen | 5.36       | 5.53      | 5.55      |           |

**Authorising Signature:**

|                |          |
|----------------|----------|
| Date completed | 28.11.22 |
| Signature      | J-P L.   |
| comments       |          |

Figure S5. Elemental analysis of MeTPA-BQ

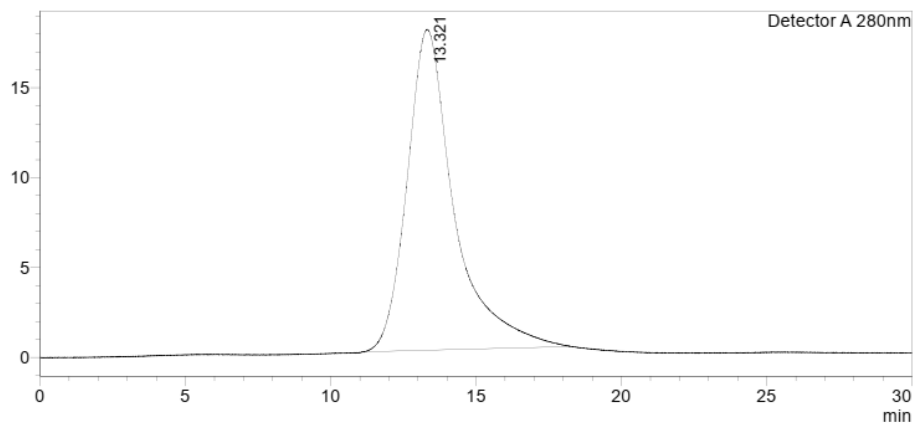

**<Peak Table>**

| Detector A 280nm |           |         |        |         |             |                    |
|------------------|-----------|---------|--------|---------|-------------|--------------------|
| Peak#            | Ret. Time | Area    | Height | Area%   | Area/Height | Width at 5% Height |
| 1                | 13.321    | 2010840 | 17839  | 100.000 | 112.719     | 4.791              |
| Total            |           | 2010840 | 17839  | 100.000 |             |                    |

Figure S6. HPLC trace of MeTPA-BQ

**1,2-bis(4-(bis(4-(tert-butyl)phenyl)amino)phenyl)ethane-1,2-dione (4)**

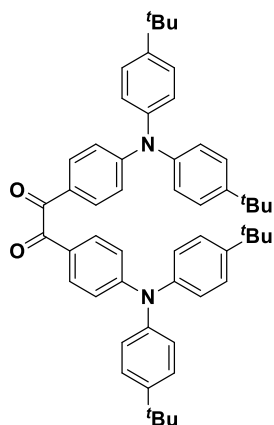

A mixture of 1,2-bis(4-bromophenyl)ethane-1,2-dione (1.00 g, 2.72 mmol, 1.0 equiv.), bis(4-(*tert*-butyl)phenyl)amine (1.61 g, 5.71 mmol, 2.1 equiv.),  $K_2CO_3$  (1.50 g, 10.87 mmol, 2.2 equiv.),  $Pd(OAc)_2$  (73.2 mg, 0.33 mmol, 0.12 equiv.) and tri-*tert*-butylphosphonium tetrafluoroborate (284 mg, 0.98 mmol, 0.36 equiv.) were placed in a dried Schlenk flask and purged with  $N_2$ . Toluene (30 mL) was added to the mixture under an  $N_2$  atmosphere. The mixture was stirred at

100 °C for 12 h, then cooled to room temperature and quenched with brine (80 mL). The product was extracted with CH<sub>2</sub>Cl<sub>2</sub>, washed several times with water (2 × 100 mL), dried over anhydrous Na<sub>2</sub>SO<sub>4</sub> and concentrated *in vacuo*. The crude mixture was purified by silica gel flash column chromatography using DCM : hexane = 2:1 as the eluent to afford the desired compound as a white solid. **Yield:** 74%. **R<sub>f</sub>:** 0.33 (DCM : hexane = 2:1 on silica gel). **Mp:** 252-254 °C. **<sup>1</sup>H NMR (400 MHz, CDCl<sub>3</sub>) δ (ppm):** 7.76 (d, *J* = 9.0 Hz, 4H), 7.38 – 7.33 (m, 8H), 7.14 – 7.08 (m, 8H), 6.92 (d, *J* = 9.1 Hz, 4H), 1.34 (s, 36H). **<sup>13</sup>C NMR (101 MHz, CDCl<sub>3</sub>) δ (ppm):** 193.60, 153.69, 148.30, 143.09, 131.60, 126.56, 126.01, 124.70, 118.06, 77.35, 77.03, 76.72, 34.51, 31.39. **HR-MS[M+H]<sup>+</sup> Calculated:** (C<sub>55</sub>H<sub>60</sub>N<sub>2</sub>O<sub>2</sub>) 769.4728; **Found:** 769.4728.

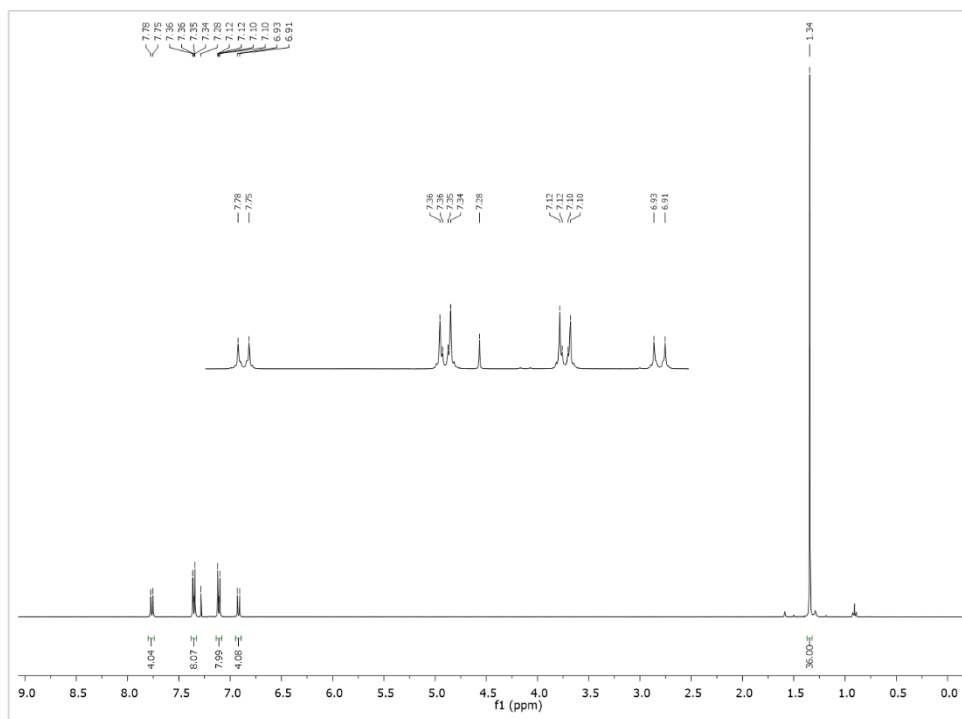

Figure S7. <sup>1</sup>H NMR of 4 in CDCl<sub>3</sub>

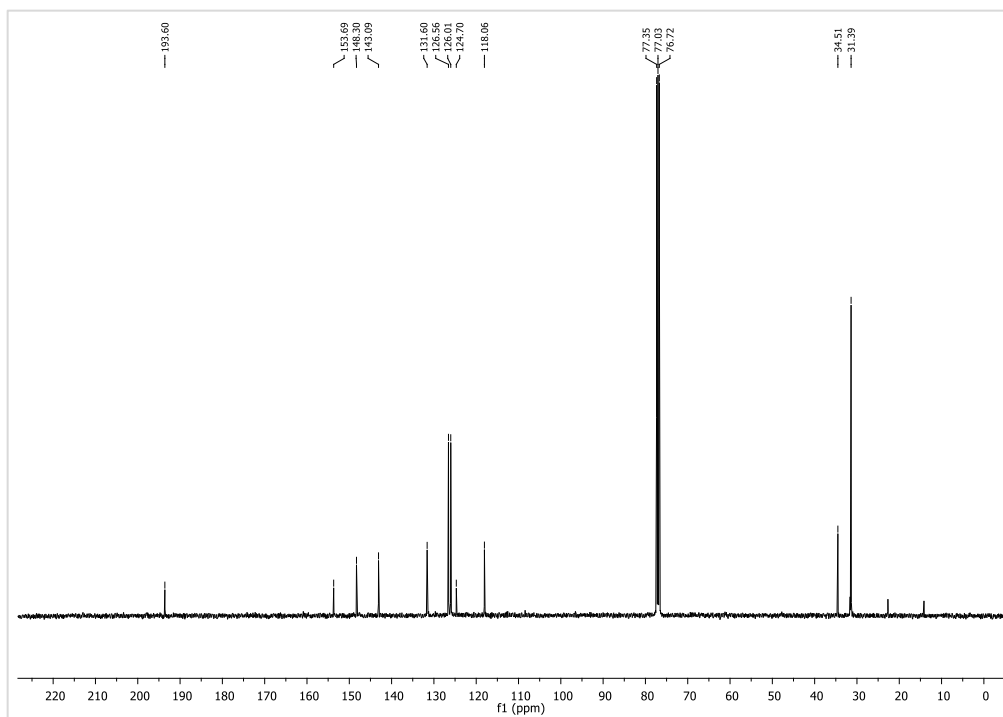

Figure S8.  $^{13}\text{C}$  NMR of **4** in  $\text{CDCl}_3$

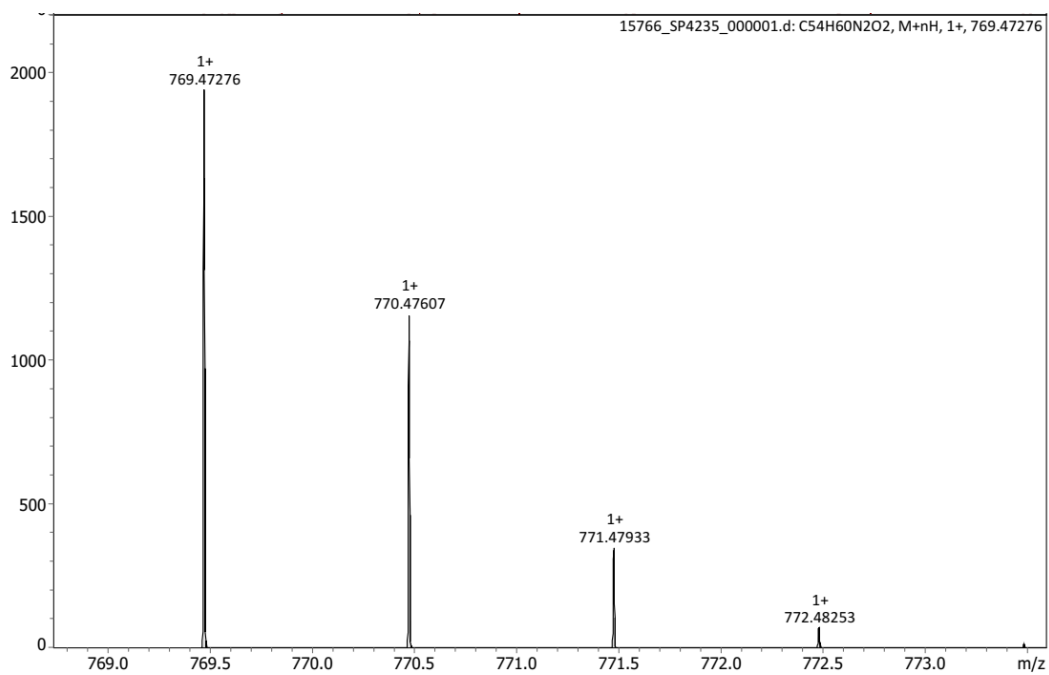

Bruker Compass DataAnalysis 5.3

printed: 14-Jun-23 3:02:25 PM

by: demo

Page 1 of 1

Figure S9. HRMS of **4**

**2,3-bis(4-(bis(4-(*tert*-butyl)phenyl)amino)phenyl)benzo[*g*]quinoxaline-5,10-dione (tBuTPA-BQ)**

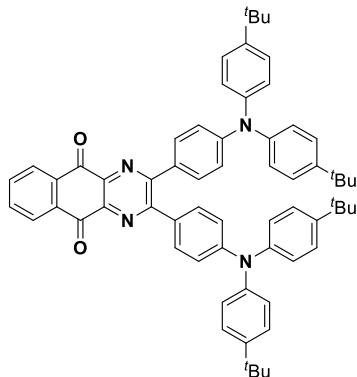

The compound **tBuTPA-BQ** was synthesized by an analogous procedure to that used for the synthesis of **MeTPA-BQ**. The stoichiometry of starting materials was 2,3-diamino-1,4-naphthoquinone (**2**) (100 mg; 531  $\mu\text{mol}$ , 1 equiv.) and 1,2-bis(4-(bis(4-(*tert*-butyl)phenyl)amino)phenyl)ethane-1,2-dione (**4**) (500 mg, 584  $\mu\text{mol}$ , 1.1 equiv.) and glacial acetic acid (5 mL). The crude mixture was purified by silica gel flash column chromatography using DCM : hexane = 3:1 as eluent to afford the desired compound as a red solid. **Yield:** 89%. **R<sub>f</sub>:** 0.3 (DCM : hexane = 2:1 on silica gel). **Mp:** 342-344 °C. **<sup>1</sup>H NMR (400 MHz, CDCl<sub>3</sub>)  $\delta$  (ppm):** 8.43 (dd,  $J = 5.7, 3.3$  Hz, 2H), 7.88 (dd,  $J = 5.8, 3.3$  Hz, 2H), 7.63 (d,  $J = 8.7$  Hz, 4H), 7.37 – 7.30 (m, 8H), 7.10 (d,  $J = 8.6$  Hz, 8H), 6.99 (d,  $J = 8.7$  Hz, 4H), 1.36 (s, 36H). **<sup>13</sup>C NMR (125 MHz, CDCl<sub>3</sub>)  $\delta$  (ppm):** 181.58, 156.15, 150.06, 147.03, 144.03, 141.17, 134.59, 133.31, 130.94, 129.22, 129.06, 128.25, 127.61, 126.25, 125.22, 120.05, 77.36, 77.04, 76.72, 34.43, 31.45. **HR-MS[M+H]<sup>+</sup> Calculated:** (C<sub>64</sub>H<sub>64</sub>N<sub>4</sub>O<sub>2</sub>) 920.5029; **Found:** 920.50809. **Anal.** Calcd. for C<sub>64</sub>H<sub>64</sub>N<sub>4</sub>O<sub>2</sub>: C, 83.44%; H, 7.00%; N, 6.08%. Found: C, 83.92%; H, 6.98%; N, 6.01%. **HPLC-GPC** purity: 100%. Retention time: 13.15 min.

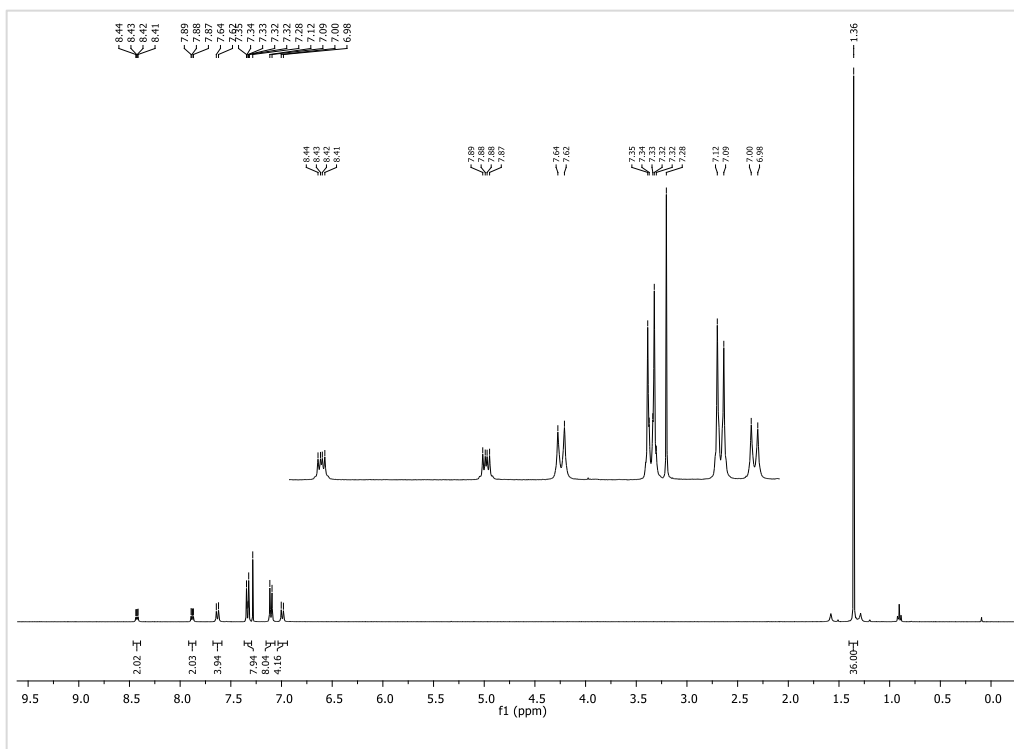

Figure S10.  $^1\text{H}$  NMR of **tBuTPA-BQ** in  $\text{CDCl}_3$

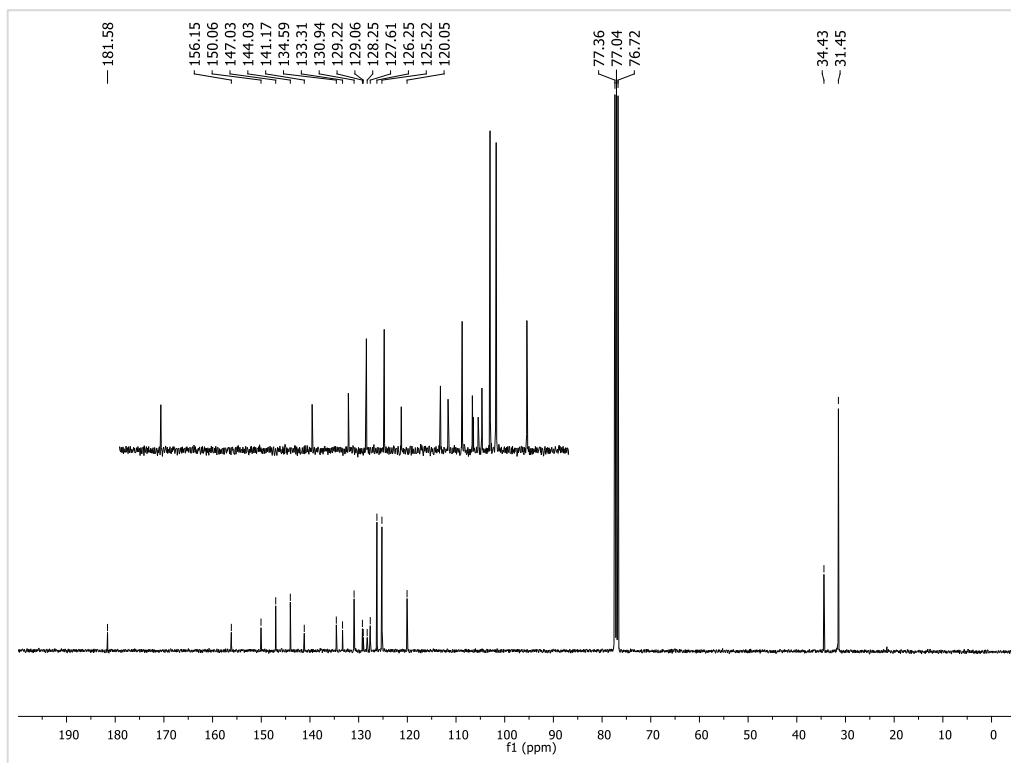

Figure S11.  $^{13}\text{C}$  NMR of **tBuTPA-BQ** in  $\text{CDCl}_3$

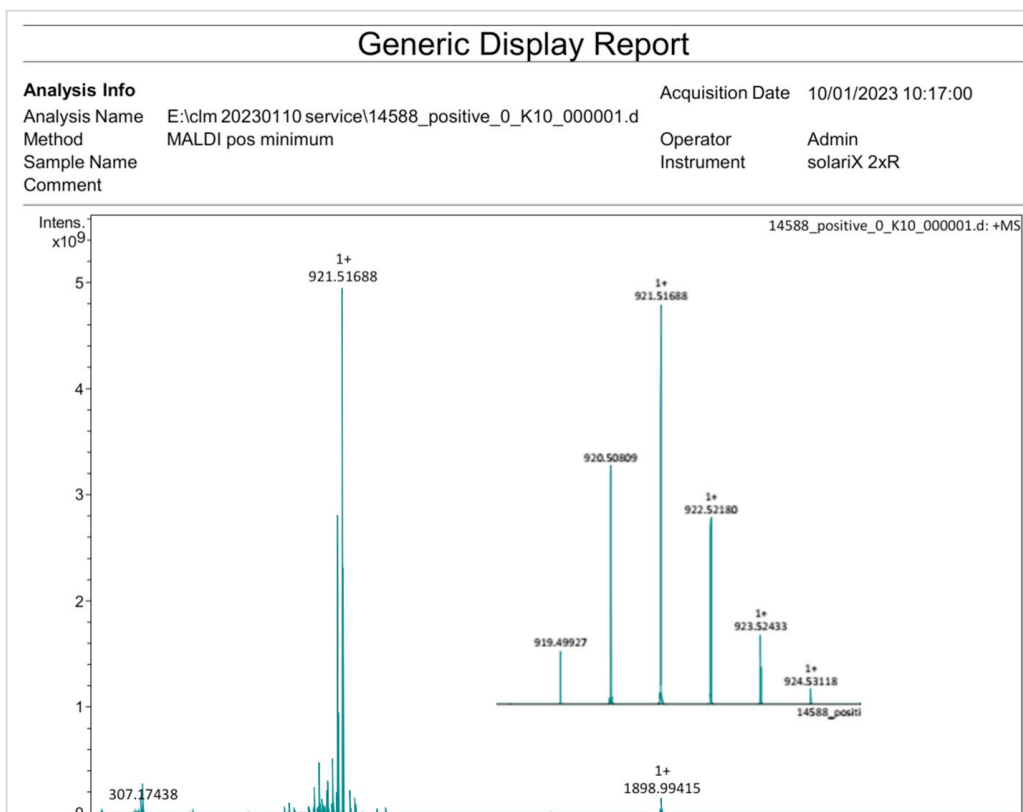

Figure S12. HRMS of **tBuTPA-BQ** (inset shows isotopic distribution pattern of molecular ion)

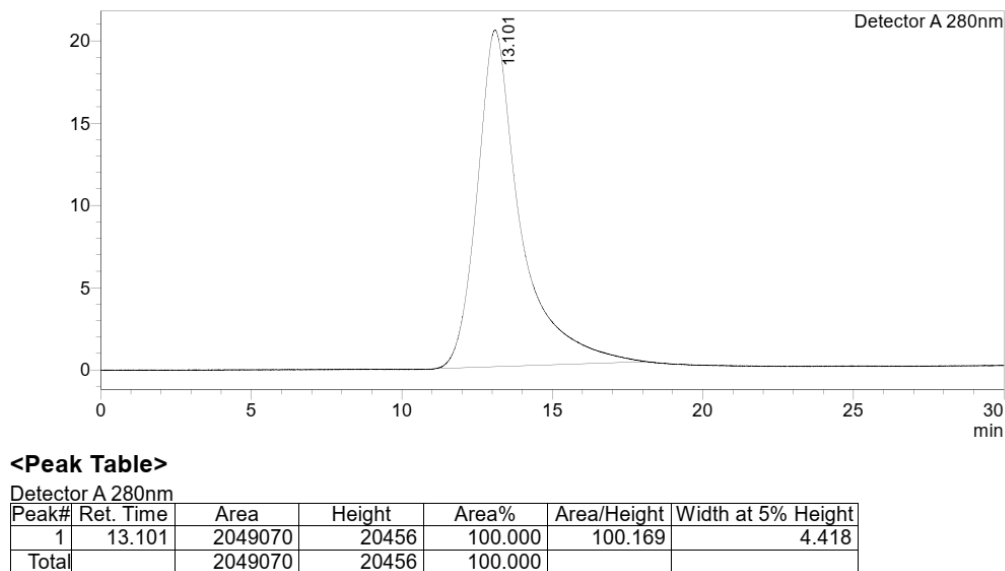

Figure S13. HPLC trace of **tBuTPA-BQ**



Single  Duplicate  Triplicate

**Analysis Result:**

| Element  | Expected % | Found (1) | Found (2) | Found (3) |
|----------|------------|-----------|-----------|-----------|
| Nitrogen | 6.08       | 6.01      | 6.02      |           |
| Carbon   | 83.44      | 83.85     | 84.05     |           |
| Hydrogen | 7.00       | 6.96      | 7.00      |           |

**Authorising Signature:**

|                |          |
|----------------|----------|
| Date completed | 09-05-23 |
| Signature      | J-PL     |
| comments       |          |

Figure S14. Elemental analysis of tBuTPA-BQ

**2,3-bis(4'-(diphenylamino)-[1,1'-biphenyl]-4-yl)benzo[g]quinoxaline-5,10-dione (TPPA-BQ)**

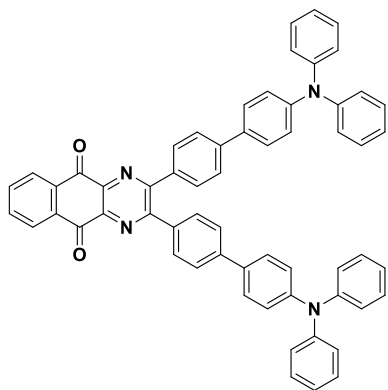

The compound **TPPA-BQ** was synthesized by an analogous procedure to that used for the synthesis of **MeTPA-BQ**. The stoichiometry of starting materials was 2,3-diamino-1,4-naphthoquinone (**2**) (200 mg, 1.06 mmol, 1 equiv.) and 1,2-bis(4'-(diphenylamino)-[1,1'-biphenyl]-4-yl)ethane-1,2-dione (**5**) (814 mg, 1.17 mmol, 1.1 equiv.) and glacial acetic acid (10 mL). The crude mixture was purified by silica gel flash column chromatography using DCM:hexane = 3:1 as eluent to afford the desired compound as a white solid. **Yield:** 82%. **R<sub>f</sub>:** 0.22 (DCM : hexane = 2:1 on silica gel). **Mp:** 197-200 °C. **<sup>1</sup>H NMR (400 MHz, CDCl<sub>3</sub>) δ (ppm):**

8.45 (dd,  $J = 5.8, 3.3$  Hz, 1H), 7.90 (dd,  $J = 5.8, 3.3$  Hz, 1H), 7.79 (d,  $J = 8.5$  Hz, 2H), 7.60 (d,  $J = 8.6$  Hz, 2H), 7.51 (d,  $J = 8.8$  Hz, 2H), 7.31 – 7.24 (m, 4H), 7.16 – 7.11 (m, 5H), 7.05 (t,  $J = 7.3$  Hz, 2H).  $^{13}\text{C}$  NMR (125 MHz,  $\text{CDCl}_3$ )  $\delta$  (ppm): 181.34, 156.57, 147.90, 147.49, 142.32, 141.93, 135.48, 134.88, 133.40, 133.28, 130.69, 129.37, 127.82, 127.76, 126.58, 124.64, 123.59, 123.22, 77.39, 77.07, 76.75. **HR-MS**[ $\text{M}+\text{Na}$ ] $^+$  **Calculated:** ( $\text{C}_{60}\text{H}_{40}\text{N}_4\text{O}_2$ ) 848.3146; **Found:** 848.3121. **Anal.** Calcd. for  $\text{C}_{60}\text{H}_{40}\text{N}_4\text{O}_2$ : C, 84.88%; H, 4.75%; N, 6.60%. **Found:** C, 84.69%; H, 4.73%; N, 6.25%. **HPLC:** 100%, retention time: 4.84 minutes in 98% MeCN/2%  $\text{H}_2\text{O}$ .

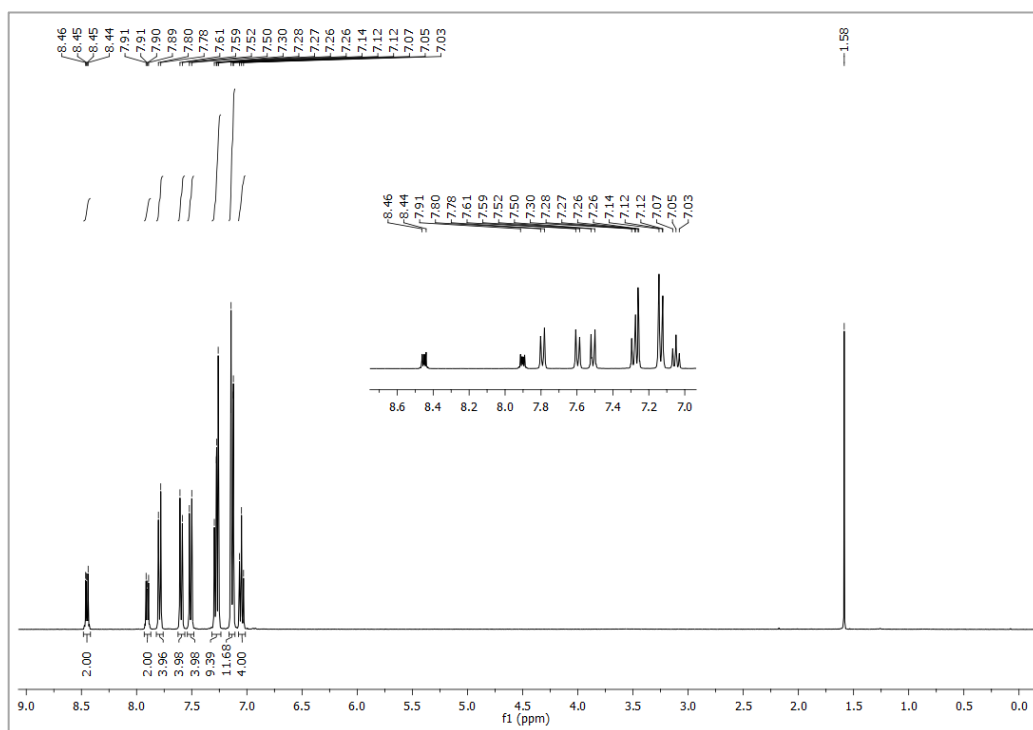

**Figure S15.**  $^1\text{H}$  NMR of TPPA-BQ in  $\text{CDCl}_3$ .

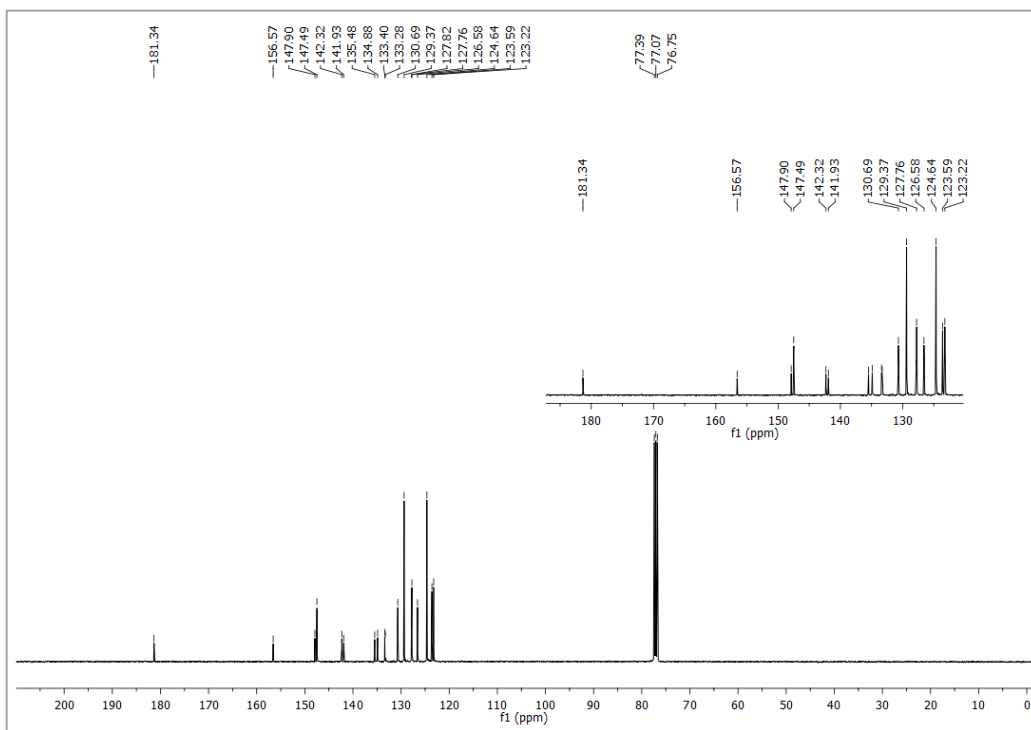

Figure S16.  $^{13}\text{C}$  NMR of TPPA-BQ in  $\text{CDCl}_3$ .

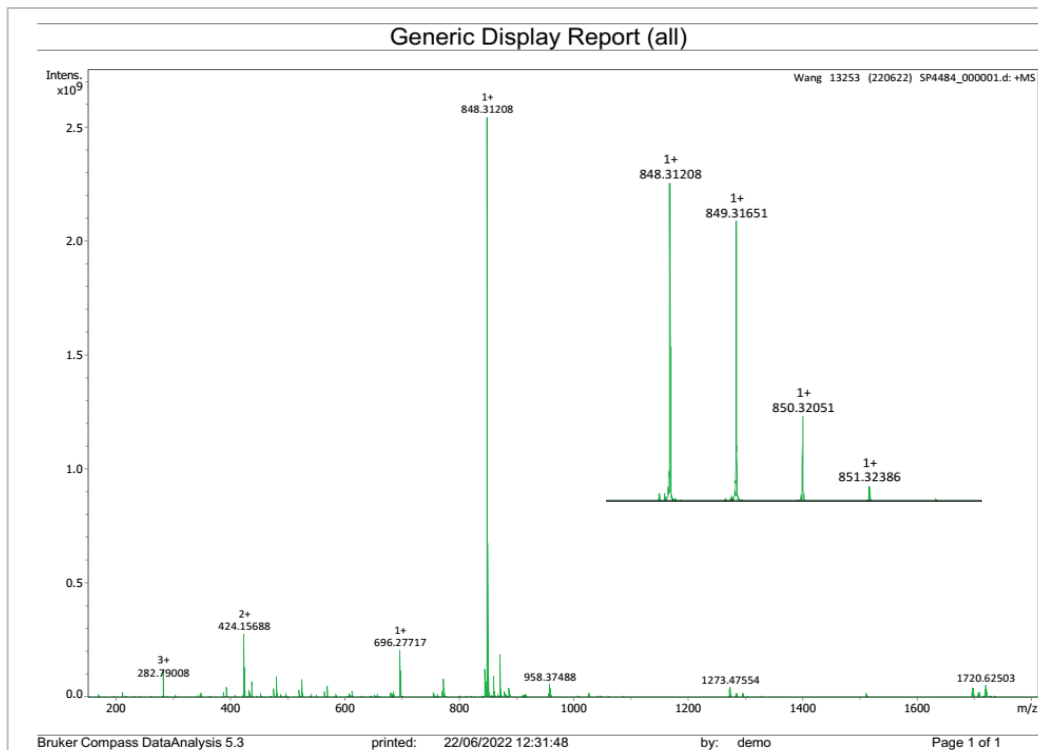

Figure S17. HRMS of TPPA-BQ (inset shows the isotopic distribution pattern of molecular ion)

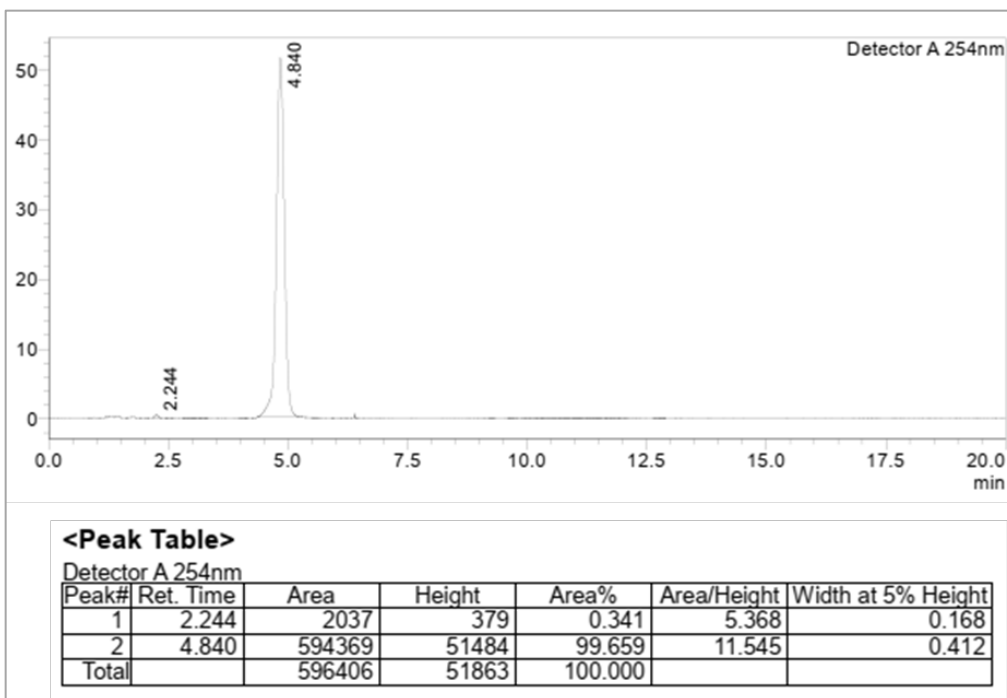

Figure S18. HPLC trace of TPPA-BQ

**Analysis type:**

Single  Duplicate  Triplicate

**Analysis Result:**

| Element  | Expected % | Found (1) | Found (2) | Found (3) |
|----------|------------|-----------|-----------|-----------|
| Nitrogen | 6.60       | 6.34      | 6.17      |           |
| Carbon   | 84.88      | 84.54     | 84.85     |           |
| Hydrogen | 4.75       | 4.74      | 4.72      |           |

**Authorising Signature:**

|                |          |
|----------------|----------|
| Date completed | 30.09.22 |
| Signature      | S-PL     |
| comments       |          |

Figure S19. Elemental analysis of TPPA-BQ

## X-ray crystallography

X-ray diffraction data for **MeTPA-BQ** and **tBuTPA-BQ** were collected at 125 K using a Rigaku MM-007HF High Brilliance RA generator/confocal optics [Cu K $\alpha$  radiation ( $\lambda = 1.54187 \text{ \AA}$ )] with XtaLAB P200 diffractometer. Intensity data were collected using  $\omega$  steps accumulating area detector images spanning at least a hemisphere of reciprocal space. Data for both compounds were collected using CrystalClear<sup>13</sup> and processed (including correction for Lorentz, polarization and absorption) using CrysAlisPro.<sup>14</sup> Structures were solved by direct methods (SIR2011<sup>15</sup>) and refined by full-matrix least-squares against  $F^2$  (SHELXL-2019/3<sup>16</sup>). Non-hydrogen atoms were refined anisotropically, and hydrogen atoms were refined using a riding model. Two of the *t*-butyl groups in **tBuTPA-BQ** showed rotational disorder, and the methyl sites were split over two locations, the minor component of one disordered *t*-butyl group requiring isotropic refinement. The disordered atoms were refined with restraints to bond distances and thermal motion. All calculations were performed using the Olex2<sup>17</sup> interface. Selected crystallographic data are presented in Table S1. CCDC 2296442-2296443 contains the supplementary crystallographic data for this paper. These data can be obtained free of charge from The Cambridge Crystallographic Data Centre via [www.ccdc.cam.ac.uk/structures](http://www.ccdc.cam.ac.uk/structures).

Table S1. Selected crystallographic data.

|                                              | <b>MeTPA-BQ</b>                                               | <b>tBuTPA-BQ</b>                                              |
|----------------------------------------------|---------------------------------------------------------------|---------------------------------------------------------------|
| formula                                      | C <sub>52</sub> H <sub>40</sub> N <sub>4</sub> O <sub>2</sub> | C <sub>64</sub> H <sub>64</sub> N <sub>4</sub> O <sub>2</sub> |
| fw                                           | 752.88                                                        | 921.19                                                        |
| crystal description                          | Red needle                                                    | Orange plate                                                  |
| crystal size [mm <sup>3</sup> ]              | 0.24×0.02×0.01                                                | 0.10×0.03×0.01                                                |
| space group                                  | $P\bar{1}$                                                    | $P\bar{1}$                                                    |
| <i>a</i> [Å]                                 | 10.0726(3)                                                    | 5.9658(2)                                                     |
| <i>b</i> [Å]                                 | 14.3581(4)                                                    | 17.8685(7)                                                    |
| <i>c</i> [Å]                                 | 15.3628(4)                                                    | 25.1599(10)                                                   |
| $\alpha$ [°]                                 | 109.639(3)                                                    | 76.932(4)                                                     |
| $\beta$ [°]                                  | 95.666(2)                                                     | 86.233(3)                                                     |
| $\gamma$ [°]                                 | 108.274(3)                                                    | 86.248(3)                                                     |
| vol [Å <sup>3</sup> ]                        | 1934.60(11)                                                   | 2603.41(19)                                                   |
| <i>Z</i>                                     | 2                                                             | 2                                                             |
| $\rho$ (calc) [g/cm <sup>3</sup> ]           | 1.292                                                         | 1.175                                                         |
| $\mu$ [mm <sup>-1</sup> ]                    | 0.620                                                         | 0.545                                                         |
| F(000)                                       | 792                                                           | 984                                                           |
| reflections collected                        | 23164                                                         | 30125                                                         |
| independent reflections ( $R_{\text{int}}$ ) | 7654 (0.0307)                                                 | 10255 (0.0948)                                                |
| parameters, restraints                       | 527, 0                                                        | 687, 207                                                      |
| GoF on $F^2$                                 | 1.051                                                         | 1.020                                                         |
| $R_1$ [ $I > 2\sigma(I)$ ]                   | 0.0416                                                        | 0.0604                                                        |
| $wR_2$ (all data)                            | 0.1179                                                        | 0.1678                                                        |
| largest diff. peak/hole [e/Å <sup>3</sup> ]  | 0.209, -0.232                                                 | 0.310, -0.296                                                 |

Table S2. Particle (blue) and hole (red) for  $S_1$ ,  $T_1$  and  $T_2$  states estimated from  $S_0$  equilibrium geometries.

| Compound                                                                            | $S_1$                                                                               | $T_1$                                                                                |
|-------------------------------------------------------------------------------------|-------------------------------------------------------------------------------------|--------------------------------------------------------------------------------------|
| 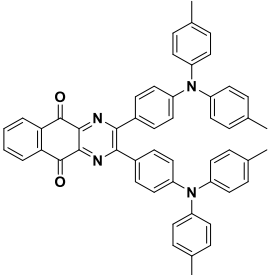   |    |   |
|   |   |  |
|  |  |  |

Table S3. Electrochemical data of MeTPA-BQ, tBuTPA-BQ and TPPA-BQ compounds.

| Emitter          | $E^{\text{ox}} / \text{V}^{\text{a}}$ | $E^{\text{red}} / \text{V}^{\text{a}}$ | HOMO / eV <sup>b</sup> | LUMO / eV <sup>b</sup> | $\Delta E_{\text{HL}} / \text{eV}^{\text{c}}$ |
|------------------|---------------------------------------|----------------------------------------|------------------------|------------------------|-----------------------------------------------|
| <b>MeTPA-BQ</b>  | 0.94                                  | -0.78                                  | -5.28                  | -3.56                  | 1.72                                          |
| <b>tBuTPA-BQ</b> | 0.91                                  | -0.79                                  | -5.25                  | -3.55                  | 1.70                                          |
| <b>TPPA-BQ</b>   | 0.97                                  | -0.76                                  | -5.31                  | -3.58                  | 1.73                                          |

<sup>a</sup>Obtained from DPV peaks and referenced with respect to SCE ( $\text{Fc}/\text{Fc}^+ = 0.46 \text{ V}$  for DCM).<sup>18</sup>

<sup>b</sup> $E_{\text{HOMO/LUMO}} = -(E^{\text{ox/red}}(\text{vs Fc}/\text{Fc}^+) + 4.8) \text{ eV}$ .<sup>19</sup> <sup>c</sup> $\Delta E_{\text{HL}} = |E_{\text{HOMO}} - E_{\text{LUMO}}|$ .

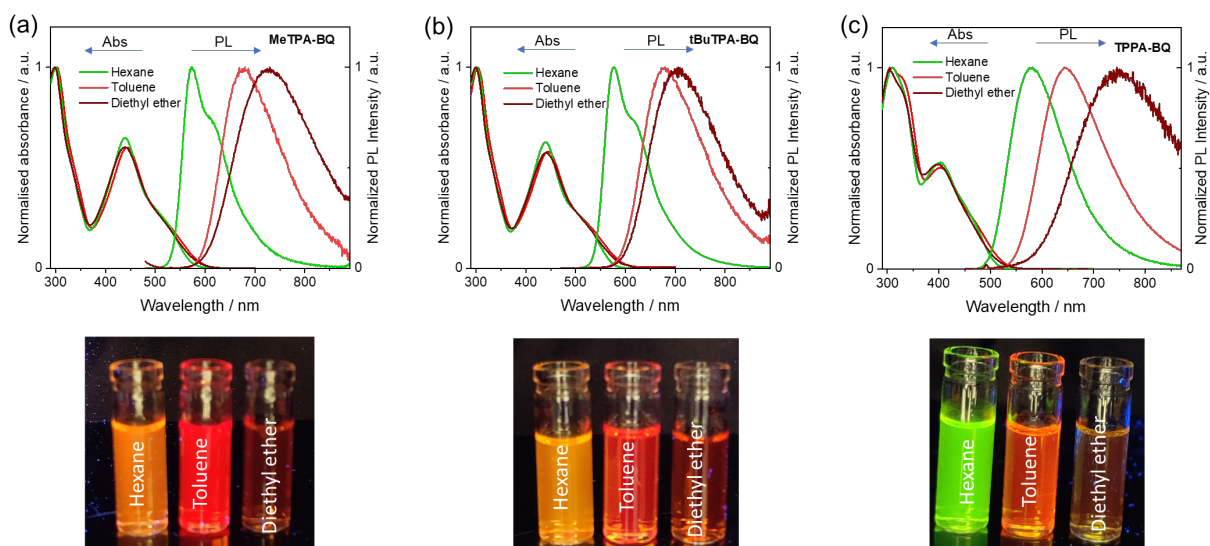

Figure S20. Absorption and PL spectra of MeTPA-BQ, tBuTPA-BQ and TPPA-BQ in different solvents of polarity ( $\lambda_{\text{exc}} = 450 \text{ nm}$ ).

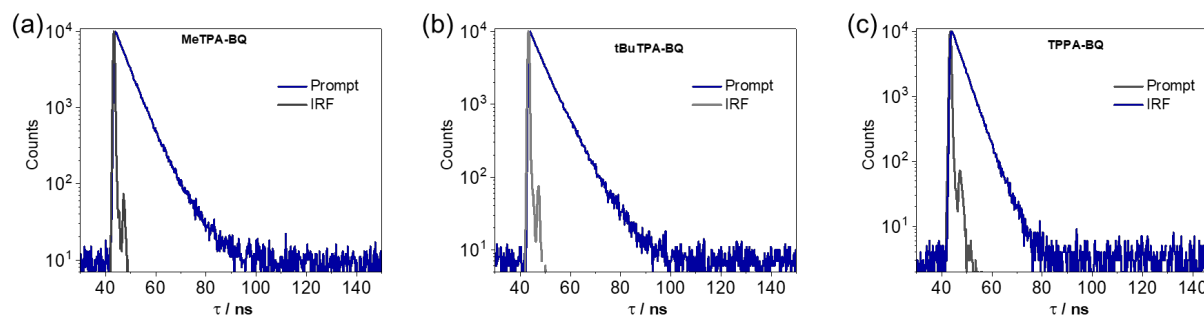

Figure S21. TRPL of (a) MeTPA-BQ, (b) tBuTPA-BQ and (c) TPPA-BQ ( $\lambda_{\text{exc}} = 375 \text{ nm}$ ) in toluene.

Table S4. Photoluminescence quantum yield ( $\Phi_{\text{PL}}$ ) of the **MeTPA-BQ**, **tBuTPA-BQ** and **TPPA-BQ** in doped CBP films.

|                  | 2 wt%                                               | 3 wt%                                               | 5 wt%                                               | 10 wt%                                              |
|------------------|-----------------------------------------------------|-----------------------------------------------------|-----------------------------------------------------|-----------------------------------------------------|
|                  | $\Phi_{\text{PL}} (\text{N}_2 / \text{O}_2) / (\%)$ | $\Phi_{\text{PL}} (\text{N}_2 / \text{O}_2) / (\%)$ | $\Phi_{\text{PL}} (\text{N}_2 / \text{O}_2) / (\%)$ | $\Phi_{\text{PL}} (\text{N}_2 / \text{O}_2) / (\%)$ |
| <b>MeTPA-BQ</b>  | 42 / 32                                             | 31 / 22                                             | 19 / 12                                             | 13 / 9                                              |
| <b>tBuTPA-BQ</b> | 41 / 30                                             | 34 / 26                                             | 23 / 16                                             | 15 / 11                                             |
| <b>TPPA-BQ</b>   | 39 / 28                                             | 30 / 23                                             | 21 / 11                                             | 10 / 8                                              |

$\Phi_{\text{PL}}$  was recorded under air/  $\text{N}_2$  atmosphere using an integrating sphere for 2 wt% doped films in CBP ( $\lambda_{\text{exc}} = 340 \text{ nm}$ ).

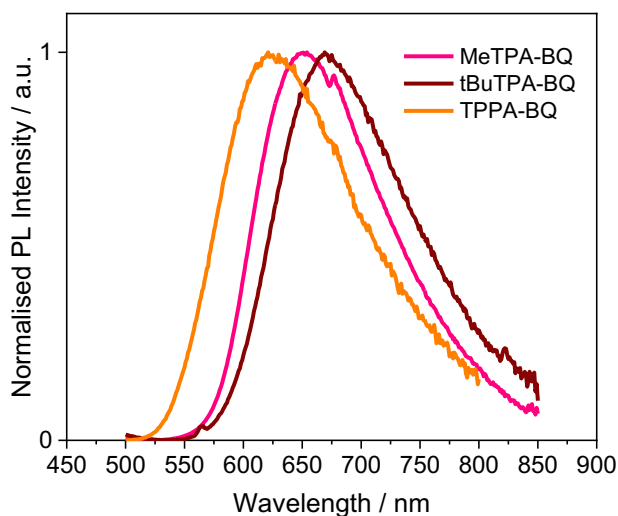

Figure S22. PL spectra of **MeTPA-BQ**, **tBuTPA-BQ** and **TPPA-BQ** in 2 wt% doped films ( $\lambda_{\text{exc}} = 340 \text{ nm}$ ).

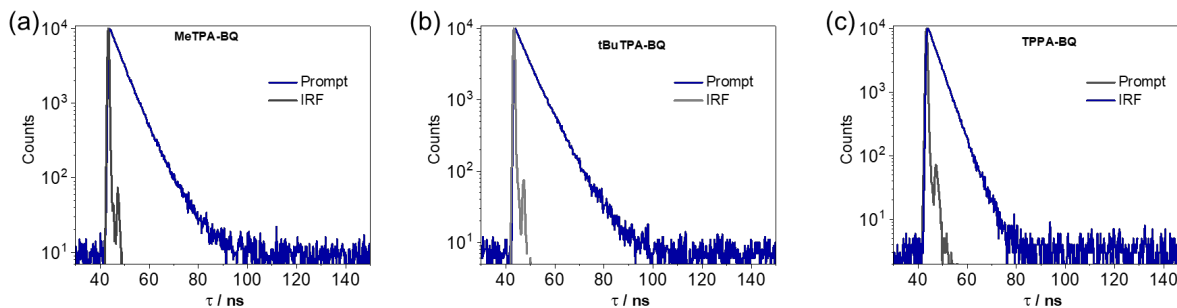

Figure S22. TRPL of (a) **MeTPA-BQ**, (b) **tBuTPA-BQ** and (c) **TPPA-BQ** ( $\lambda_{\text{exc}} = 375 \text{ nm}$ ).



Table S5. Decay components of prompt emission and delayed emission and average lifetimes of MeTPA-BQ, tBuTPA-BQ and TPPA-BQ in doped CBP films.

|                  | $\tau_p$ (relative contribution) / ns <sup>a</sup> | $\tau_{av, p}$ / ns <sup>b</sup> | $\chi^2$ | $\tau_d$ (relative contribution) / $\mu$ s <sup>c</sup> | $\tau_{av, d}$ / $\mu$ s <sup>d</sup> | $\chi^2$ |
|------------------|----------------------------------------------------|----------------------------------|----------|---------------------------------------------------------|---------------------------------------|----------|
| <b>MeTPA-BQ</b>  | $\tau_1 = 4.2$ (22%)<br>$\tau_2 = 9.1$ (78%)       | 8.0                              | 0.99     | $\tau_2 = 5.9$ (46%)<br>$\tau_3 = 69.2$ (54%)           | 40.1                                  | 1.3      |
| <b>tBuTPA-BQ</b> | $\tau_1 = 3.5$ (22%)<br>$\tau_2 = 11.6$ (78%)      | 9.9                              | 1.05     | $\tau_1 = 13.9$ (14%)<br>$\tau_2 = 165.0$ (86%)         | 143.8                                 | 1.2      |
| <b>TPPA-BQ</b>   | $\tau_1 = 8.0$ (52%)<br>$\tau_2 = 16.7$ (48%)      | 12.2                             | 0.98     | $\tau_1 = 8.3$ (37%)<br>$\tau_2 = 63.3$ (63%)           | 42.8                                  | 1.1      |

<sup>a</sup>Prompt average lifetime ( $\tau_p$ ) was recorded using time-correlated single photon counting (TCSPC) ( $\lambda_{exc} = 375$  nm), <sup>c</sup>Delayed average lifetime ( $\tau_d$ ) was recorded using a microsecond flash lamp ( $\lambda_{exc} = 340$  nm). <sup>b,d</sup>Average lifetime calculated using  $\Sigma(A_n\tau_n^2)/\Sigma(A_n\tau_n)$ , where  $A_n$  is the coefficient of the exponential functions.

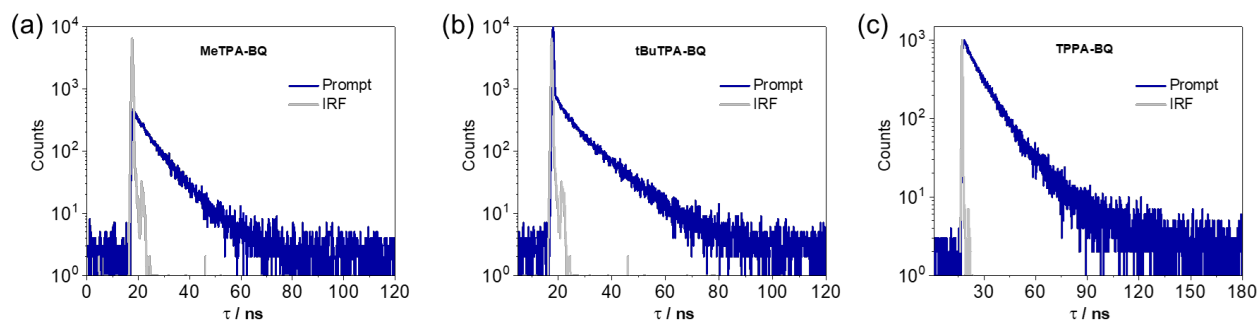

Figure S23. TRPL of (a) MeTPA-BQ, (b) tBuTPA-BQ and (c) TPPA-BQ ( $\lambda_{exc} = 375$  nm) in 2 wt% doped CBP films.

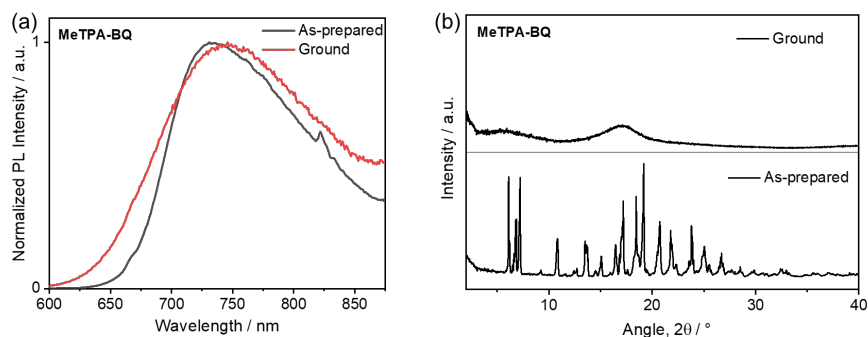

Figure S24. (a) PL of as prepared and ground of MeTPA-BQ ( $\lambda_{exc} = 450$  nm) and their corresponding (b) PXR spectra.

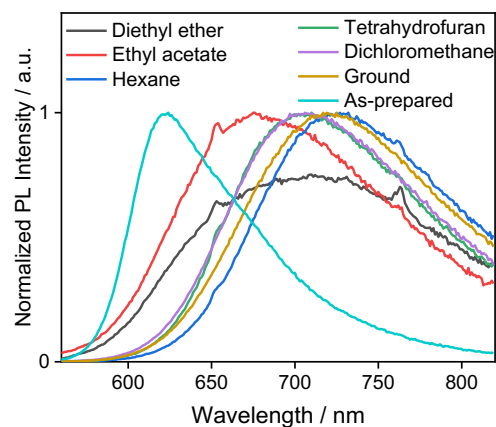

Figure S25. PL spectra of ground **tBuTPA-BQ** upon exposure to different solvents ( $\lambda_{\text{exc}} = 450$  nm).

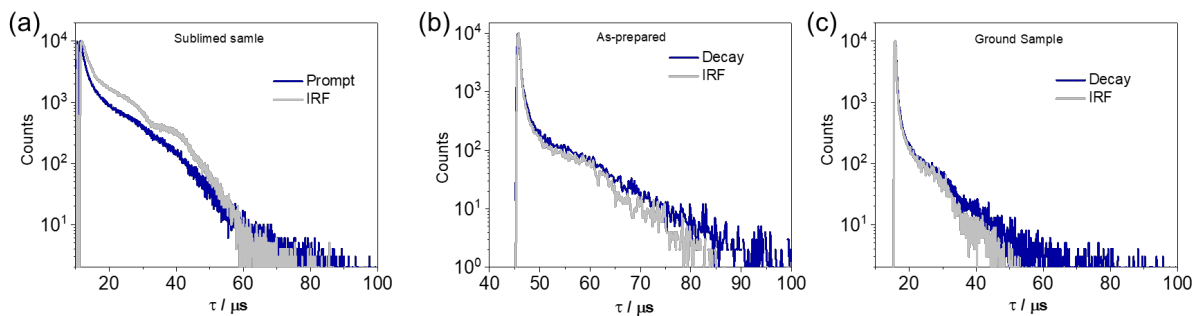

Figure S26. TRPL spectra of (a) sublimed (b) as-prepared and (c) ground samples of **tBuTPA-BQ** (indicating no PL decay observed for these samples).

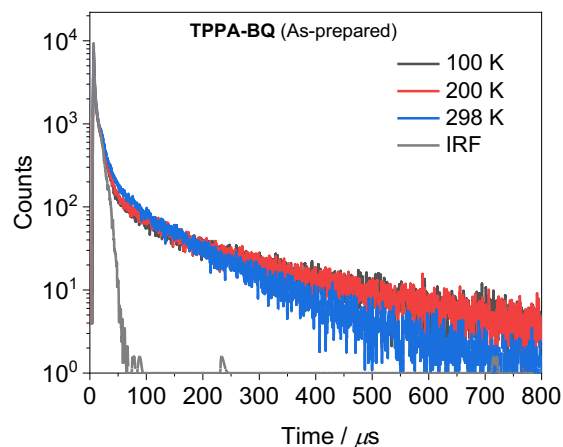

Figure S27. TRPL spectra of **TPPA-BQ** (as-prepared sample) ( $\lambda_{\text{exc}} = 450$  nm).

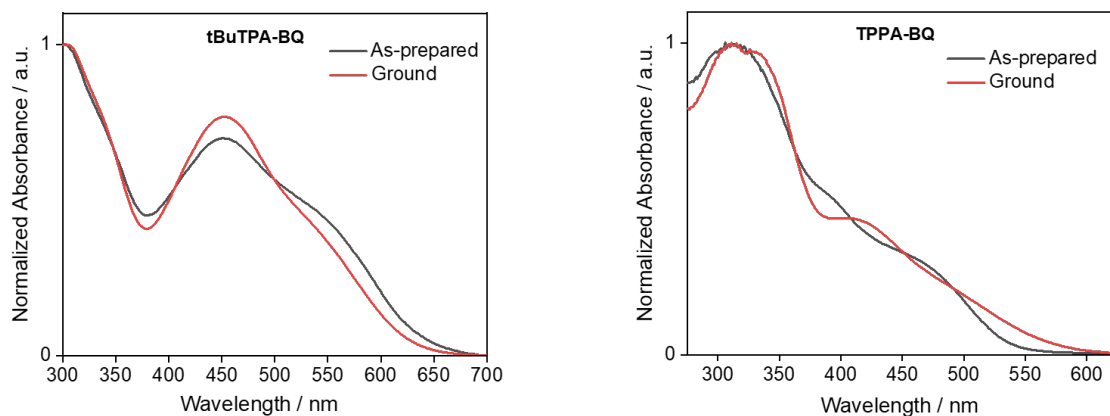

Figure S28. Absorption spectra of the as prepared and ground samples of the **tBuTPA-BQ** and **TPPA-BQ**.

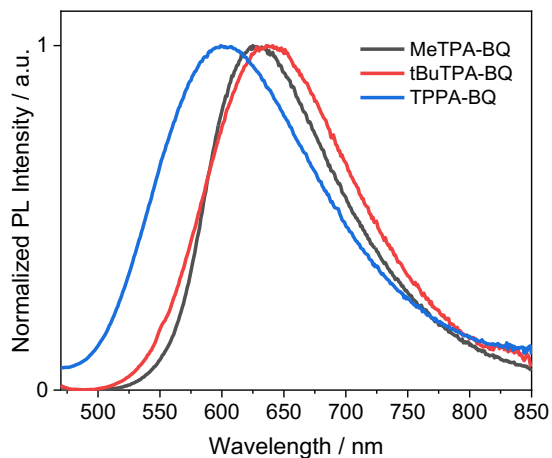

Figure S29. PL spectra of **MeTPA-BQ**, **tBuTPA-BQ** and **TPPA-BQ** in 0.5 wt% doped films in PMMA ( $\lambda_{exc} = 450$  nm).

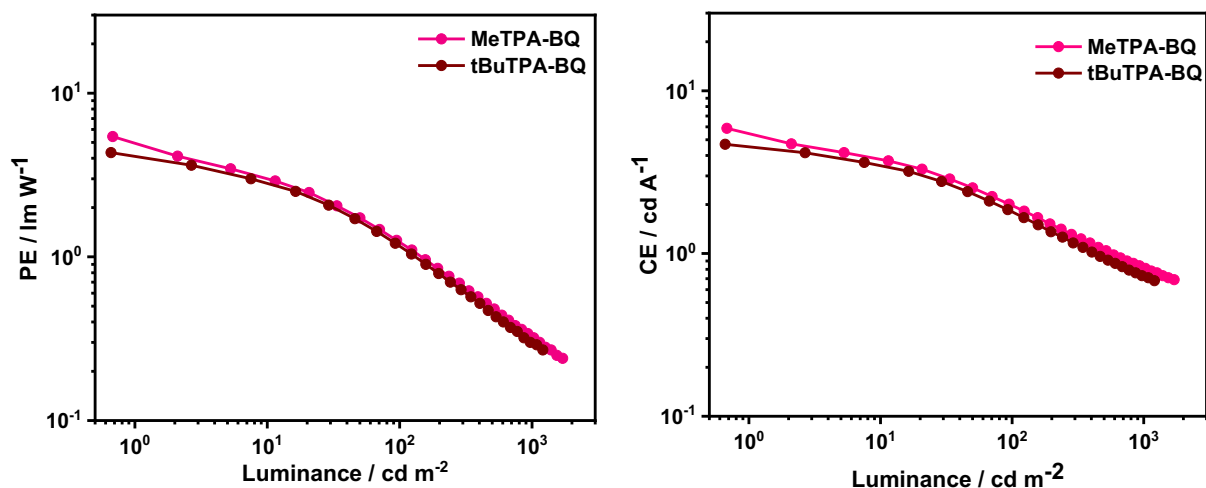

Figure S30. a) Power efficiency versus luminance and b) current efficiency versus luminance curves for devices **MeTPA-BQ** (2 wt%) and **tBuTPA-BQ** (2 wt%) doped in CBP host.

Table S6. EL performance of representative deep-red TADF OLEDs with emission peak between 650 and 670 nm.

| Emitter           | EQE <sub>max</sub> | CIE (x, y)          | $\lambda_{\text{max}}$ | Reference           |
|-------------------|--------------------|---------------------|------------------------|---------------------|
| DDTPACz-DCPP      | 13.1               | (0.63, 0.37)        | 652                    | 20                  |
| <i>p</i> TPA-DPPZ | 12.3               | (0.67, 0.33)        | 652                    | 21                  |
| PXZ-10-DPPZ       | 0.8                | (0.65, 0.35)        | 655                    | 22                  |
| TPA-QCN           | 12.8               | (0.64, 0.35)        | 656                    | 23                  |
| BPPZ-PXZ          | 2.5                | (0.65, 0.35)        | 656                    | 24                  |
| PIPAQ             | 2.1                | (0.64, 0.36)        | 656                    | 25                  |
| TPAAP             | 14.1               | -                   | 657                    | 26                  |
| BTZ-DMAC          | 5.3                | (0.63, 0.36)        | 658                    | 27                  |
| <i>p</i> CNQ-TPA  | 30.3               | (0.69, 0.31)        | 660                    | 28                  |
| TPA-PPDCN         | 20.2               | (0.68, 0.32)        | 664                    | 29                  |
| PA-DCPP           | 9.8                | (0.68, 0.32)        | 668                    | 30                  |
| APDC-DTPA         | 12.3               | -                   | 668                    | 31                  |
| Da-CNBPz          | 15.0               | (0.66, 0.34)        | 670                    | 32                  |
| <b>MeTPA-BQ</b>   | <b>10.1</b>        | <b>(0.64, 0.34)</b> | <b>650</b>             | <b>Present work</b> |
| <b>tBuTPA-BQ</b>  | <b>8.5</b>         | <b>(0.66, 0.34)</b> | <b>670</b>             | <b>Present work</b> |

## References

1. Y. Wang, Z. He, G. Chen, T. Shan, W. Yuan, P. Lu and Y. Zhang, D-A structured high efficiency solid luminogens with tunable emissions: Molecular design and photophysical properties, *Chin. Chem. Lett.*, 2017, **28**, 2133-2138.
2. Q. Fan, J. Cui, Y. Liu, W. Su, Y. Wang, H. Tan, D. Yu, H. Gao, X. Deng and W. Zhu, Synthesis and photovoltaic properties of two star-shaped molecules involving phenylquinoxaline as core and triphenylamine and thiophene units as arms, *Synth. Met.*, 2015, **204**, 25-31.
3. B. Chesneau, M. Hardouin-Lerouge and P. Hudhomme, A Fused Donor–Acceptor System Based on an Extended Tetrathiafulvalene and a Ruthenium Complex of Dipyridoquinoxaline, *Org. Lett.*, 2010, **12**, 4868-4871.
4. M. J. Frisch, G. W. Trucks, H. B. Schlegel, G. E. Scuseria, M. A. Robb, J. R. Cheeseman, G. Scalmani, V. Barone, G. A. Petersson, H. Nakatsuji, X. Li, M. Caricato, A. V. Marenich, J. Bloino, B. G. Janesko, R. Gomperts, B. Mennucci, H. P. Hratchian, J. V. Ortiz, A. F. Izmaylov, J. L. Sonnenberg, Williams, F. Ding, F. Lipparini, F. Egidi, J. Goings, B. Peng, A. Petrone, T. Henderson, D. Ranasinghe, V. G. Zakrzewski, J. Gao, N. Rega, G. Zheng, W. Liang, M. Hada, M. Ehara, K. Toyota, R. Fukuda, J. Hasegawa, M. Ishida, T. Nakajima, Y. Honda, O. Kitao, H. Nakai, T. Vreven, K. Throssell, J. A. Montgomery Jr., J. E. Peralta, F. Ogliaro, M. J. Bearpark, J. J. Heyd, E. N. Brothers, K. N. Kudin, V. N. Staroverov, T. A. Keith, R. Kobayashi, J. Normand, K. Raghavachari, A. P. Rendell, J. C. Burant, S. S. Iyengar, J. Tomasi, M. Cossi, J. M. Millam, M. Klene, C. Adamo, R. Cammi, J. W. Ochterski, R. L. Martin, K. Morokuma, O. Farkas, J. B. Foresman and D. J. Fox, Gaussian 16 Rev. C.01. *Journal*, 2016.
5. C. Adamo and V. Barone, Toward reliable density functional methods without adjustable parameters: The PBE0 model, *J. Chem. Phys.*, 1999, **110**, 6158-6170.
6. G. A. Petersson, T. G. Tensfeldt and J. A. Montgomery, Jr., A complete basis set model chemistry. III. The complete basis set-quadratic configuration interaction family of methods, *J. Chem. Phys.*, 1991, **94**, 6091-6101.
7. S. Hirata and M. Head-Gordon, Time-dependent density functional theory within the Tamm–Dancoff approximation, *Chem. Phys. Lett*, 1999, **314**, 291-299.
8. R. Dennington, T. A. Keith and J. M. Millam, *Semichem Inc.: Shawnee Mission, KS, USA*, 2016.
9. A.-R. Allouche, Gabedit—A graphical user interface for computational chemistry softwares, *J. Comput. Chem*, 2011, **32**, 174-182.
10. W. Humphrey, A. Dalke and K. Schulten, VMD: Visual molecular dynamics, *J. Mol. Graph.*, 1996, **14**, 33-38.
11. J. Edward, F. Ercal, F. G. Walters and H. J. Pottinger, AN EFFICIENT LIBRARY FOR PARALLEL RAY TRACING AND ANIMATION, University of Missouri-Rolla, 1998.
12. V. V. Pavlishchuk and A. W. Addison, Conversion constants for redox potentials measured versus different reference electrodes in acetonitrile solutions at 25°C, *Inorg. Chim. Acta*, 2000, **298**, 97-102.
13. *CrystalClear-SM Expert v2.1*. Rigaku Americas, The Woodlands, Texas, USA, and Rigaku Corporation, Tokyo, Japan,, 2015.
14. *CrysAlisPro v1.171.42.49*. Rigaku Oxford Diffraction, Rigaku Corporation, Oxford, U.K., 2022.
15. M. C. Burla, R. Caliandro, M. Camalli, B. Carrozzini, G. L. Casciaro, C. Giacovazzo, M. Mallamo, A. Mazzone, G. Polidori and R. Spagna, SIR2011: a new package for crystal structure determination and refinement, *J. Appl. Crystallogr.*, 2012, **45**, 357-361.
16. G. Sheldrick, Crystal structure refinement with SHELXL, *Acta Crystallographica Section C*, 2015, **71**, 3-8.

17. O. V. Dolomanov, L. J. Bourhis, R. J. Gildea, J. A. K. Howard and H. Puschmann, OLEX2: a complete structure solution, refinement and analysis program, *J. Appl. Crystallogr.*, 2009, **42**, 339-341.
18. N. G. Connelly and W. E. Geiger, Chemical Redox Agents for Organometallic Chemistry, *Chem. Rev.*, 1996, **96**, 877-910.
19. C. M. Cardona, W. Li, A. E. Kaifer, D. Stockdale and G. C. Bazan, Electrochemical Considerations for Determining Absolute Frontier Orbital Energy Levels of Conjugated Polymers for Solar Cell Applications, *Adv. Mater.*, 2011, **23**, 2367-2371.
20. B. Wang, H. Yang, Y. Zhang, G. Xie, H. Ran, T. Wang, Q. Fu, Y. Ren, N. Sun, G. Zhao, J.-Y. Hu and Q. Wang, Highly efficient electroluminescence from evaporation- and solution-processable orange-red thermally activated delayed fluorescence emitters, *J. Mater. Chem. C.*, 2019, **7**, 12321-12327.
21. B. Zhao, H. Wang, C. Han, P. Ma, Z. Li, P. Chang and H. Xu, Highly Efficient Deep-Red Non-Doped Diodes Based on a T-Shape Thermally Activated Delayed Fluorescence Emitter, *Angew. Chem. Int. Ed.*, 2020, **59**, 19042-19047.
22. C. Zhou, W.-C. Chen, H. Liu, X. Cao, N. Li, Y. Zhang, C.-S. Lee and C. Yang, Isomerization enhanced quantum yield of dibenzo[a,c]phenazine-based thermally activated delayed fluorescence emitters for highly efficient orange OLEDs, *J. Mater. Chem. C.*, 2020, **8**, 9639-9645.
23. C. Li, R. Duan, B. Liang, G. Han, S. Wang, K. Ye, Y. Liu, Y. Yi and Y. Wang, Deep-Red to Near-Infrared Thermally Activated Delayed Fluorescence in Organic Solid Films and Electroluminescent Devices, *Angew. Chem. Int. Ed.*, 2017, **56**, 11525-11529.
24. Y.-L. Zhang, Q. Ran, Q. Wang, Y. Liu, C. Hänisch, S. Reineke, J. Fan and L.-S. Liao, High-Efficiency Red Organic Light-Emitting Diodes with External Quantum Efficiency Close to 30% Based on a Novel Thermally Activated Delayed Fluorescence Emitter, *Adv. Mater.*, 2019, **31**, 1902368.
25. W.-C. Chen, B. Huang, S.-F. Ni, Y. Xiong, A. L. Rogach, Y. Wan, D. Shen, Y. Yuan, J.-X. Chen, M.-F. Lo, C. Cao, Z.-L. Zhu, Y. Wang, P. Wang, L.-S. Liao and C.-S. Lee, Deep-Red/Near-Infrared Electroluminescence from Single-Component Charge-Transfer Complex via Thermally Activated Delayed Fluorescence Channel, *Adv. Funct. Mater.*, 2019, **29**, 1903112.
26. J. Xue, Q. Liang, R. Wang, J. Hou, W. Li, Q. Peng, Z. Shuai and J. Qiao, Highly Efficient Thermally Activated Delayed Fluorescence via J-Aggregates with Strong Intermolecular Charge Transfer, *Adv. Mater.*, 2019, **31**, 1808242.
27. F. Ni, Z. Wu, Z. Zhu, T. Chen, K. Wu, C. Zhong, K. An, D. Wei, D. Ma and C. Yang, Teaching an old acceptor new tricks: rationally employing 2,1,3-benzothiadiazole as input to design a highly efficient red thermally activated delayed fluorescence emitter, *J. Mater. Chem. C.*, 2017, **5**, 1363-1368.
28. Z. Li, D. Yang, C. Han, B. Zhao, H. Wang, Y. Man, P. Ma, P. Chang, D. Ma and H. Xu, Optimizing Charge Transfer and Out-Coupling of A Quasi-Planar Deep-Red TADF Emitter: towards Rec.2020 Gamut and External Quantum Efficiency beyond 30 %, *Angew. Chem. Int. Ed.*, 2021, **60**, 14846-14851.
29. T. Yang, B. Liang, Z. Cheng, C. Li, G. Lu and Y. Wang, Construction of Efficient Deep-Red/Near-Infrared Emitter Based on a Large  $\pi$ -Conjugated Acceptor and Delayed Fluorescence OLEDs with External Quantum Efficiency of over 20%, *J. Phys. Chem. C.*, 2019, **123**, 18585-18592.
30. S. Wang, X. Yan, Z. Cheng, H. Zhang, Y. Liu and Y. Wang, Highly Efficient Near-Infrared Delayed Fluorescence Organic Light Emitting Diodes Using a Phenanthrene-Based Charge-Transfer Compound, *Angew. Chem. Int. Ed.*, 2015, **54**, 13068-13072.
31. Y. Hu, Y. Yuan, Y.-L. Shi, D. Li, Z.-Q. Jiang and L.-S. Liao, Efficient Near-Infrared Emission by Adjusting the Guest-Host Interactions in Thermally Activated Delayed Fluorescence Organic Light-Emitting Diodes, *Adv. Funct. Mater.*, 2018, **28**, 1802597.

32. R. Furue, K. Matsuo, Y. Ashikari, H. Ooka, N. Amanokura and T. Yasuda, Highly Efficient Red–Orange Delayed Fluorescence Emitters Based on Strong  $\pi$ -Accepting Dibenzophenazine and Dibenzoxinoxaline Cores: toward a Rational Pure-Red OLED Design, *Adv. Opt. Mater.*, 2018, **6**, 1701147.
